# Supplementary material
Source: PubMed Central journal article supplement (PMC3197971)
Supplement: NIHMS306267-supplement-Supp_Material_S1.pdf [file NIHMS306267-supplement-Supp_Material_S1.pdf]

## Web-based Supplementary Materials for “Informative Dorfman Screening”

Christopher S. McMahan,<sup>1</sup> Joshua M. Tebbs,<sup>1,\*</sup> and Christopher R. Bilder<sup>2</sup>

<sup>1</sup>Department of Statistics, University of South Carolina, Columbia, SC 29208, U.S.A.

<sup>2</sup>Department of Statistics, University of Nebraska, Lincoln, NE 68583, U.S.A.

\* *email*: tebbs@stat.sc.edu

**Web Appendix A:** *Derivation of  $E(T)$  and  $\text{var}(T)$  for ID.* Let  $\tilde{G}_j = 1$ , if the  $j$ th pool is truly positive; i.e.,  $\mathcal{P}_j$  contains at least one positive individual,  $\tilde{G}_j = 0$ , otherwise, for  $j = 1, 2, \dots, J$ . Because the individual statuses are independent,

$$\text{pr}(\tilde{G}_j = 1) = 1 - \prod_{k=1}^{c_j} (1 - p_{j(k)})$$

and  $\text{pr}(\tilde{G}_j = 0) = 1 - \text{pr}(\tilde{G}_j = 1)$ . Let  $G_j = 1$ , if  $\mathcal{P}_j$  tests positive,  $G_j = 0$ , otherwise. By the Law of Total Probability,

$$\begin{aligned} \text{pr}(G_j = 1) &= \text{pr}(G_j = 1 | \tilde{G}_j = 1) \text{pr}(\tilde{G}_j = 1) + \text{pr}(G_j = 1 | \tilde{G}_j = 0) \text{pr}(\tilde{G}_j = 0) \\ &= S_e \text{pr}(\tilde{G}_j = 1) + (1 - S_p) \text{pr}(\tilde{G}_j = 0) \\ &= S_e + (1 - S_e - S_p) \text{pr}(\tilde{G}_j = 0) \\ &= S_e + (1 - S_e - S_p) \prod_{k=1}^{c_j} (1 - p_{j(k)}), \end{aligned}$$

where  $S_e$  and  $S_p$  denote the test sensitivity and test specificity, respectively. Let  $T_{\mathcal{P}_j}$  denote the number of tests needed to decode  $\mathcal{P}_j$ . If  $c_j > 1$ , the support of  $T_{\mathcal{P}_j}$  is  $\{1, c_j + 1\}$ , where  $\text{pr}(T_{\mathcal{P}_j} = 1) = \text{pr}(G_j = 0)$ , and  $\text{pr}(T_{\mathcal{P}_j} = c_j + 1) = \text{pr}(G_j = 1)$ . Note that if  $c_j = 1$ , then  $\text{pr}(T_{\mathcal{P}_j} = 1) = 1$ . Therefore,

$$\begin{aligned} E(T) = \sum_{j=1}^J E(T_{\mathcal{P}_j}) &= \sum_{j=1}^J [I(c_j > 1) \{(c_j + 1) \text{pr}(G_j = 1) + \text{pr}(G_j = 0)\} + I(c_j = 1)] \\ &= \sum_{j=1}^J [I(c_j > 1) \{c_j \text{pr}(G_j = 1) + 1\} + I(c_j = 1)] \\ &= J + \sum_{j=1}^J c_j I(c_j > 1) \text{pr}(G_j = 1), \end{aligned}$$

as claimed. The variance of  $T_{\mathcal{P}_j}$  is  $\text{var}(T_{\mathcal{P}_j}) = E(T_{\mathcal{P}_j}^2) - \{E(T_{\mathcal{P}_j})\}^2$ , where

$$\begin{aligned} E(T_{\mathcal{P}_j}^2) &= I(c_j > 1)\{(c_j + 1)^2\text{pr}(G_j = 1) + \text{pr}(G_j = 0)\} + I(c_j = 1) \\ &= I(c_j > 1)\{c_j^2 + 2c_j\}\text{pr}(G_j = 1) + 1\} + I(c_j = 1) \end{aligned}$$

and

$$\begin{aligned} \{E(T_{\mathcal{P}_j})\}^2 &= [I(c_j > 1)\{(c_j + 1)\text{pr}(G_j = 1) + \text{pr}(G_j = 0)\} + I(c_j = 1)]^2 \\ &= \{I(c_j > 1)c_j\text{pr}(G_j = 1) + 1 + I(c_j = 1)\}^2 \\ &= I(c_j > 1)\{c_j\text{pr}(G_j = 1) + 1\}^2 + I(c_j = 1). \end{aligned}$$

Therefore,

$$\begin{aligned} \text{var}(T_{\mathcal{P}_j}) &= I(c_j > 1)[(c_j^2 + 2c_j)\text{pr}(G_j = 1) + 1 - \{c_j\text{pr}(G_j = 1) + 1\}^2] \\ &= I(c_j > 1)[c_j^2\text{pr}(G_j = 1) - c_j^2\{\text{pr}(G_j = 1)\}^2] \\ &= I(c_j > 1)c_j^2\text{pr}(G_j = 1)\{1 - \text{pr}(G_j = 1)\} \\ &= c_j^2 I(c_j > 1)\text{pr}(G_j = 1)\text{pr}(G_j = 0). \end{aligned}$$

Since the  $J$  pools are independent,  $\text{var}(T) = \sum_{j=1}^J \text{var}(T_{\mathcal{P}_j})$ , and the result follows.  $\square$

**Web Appendix B: Informative Dorfman algorithms.** The notation from Section 3.1 (OD), Section 3.2 (TOD), and Section 3.3 (PSOD) is used. An R program that implement these algorithms is available from the authors.

OD ALGORITHM:

1. Order the  $N$  individuals as in ID.
2. Specify a maximum allowable pool size  $M$ .
3. Let  $c_{opt} = 1$  and  $E(T^{(c_{opt})}) = N$ .
4. Let  $c = \min\{c_{opt} + 1, M\}$ ,  $J = \lceil N/c \rceil$ ,  $c_J = N - c(J - 1)$ , and calculate

$$E(T^{(c)}) = J + c \sum_{j=0}^{J-2} \left\{ S_e + (1 - S_e - S_p) \prod_{k=1}^c (1 - p_{(jc+k)}) \right\} \\ + c_J \left\{ S_e + (1 - S_e - S_p) \prod_{k=1}^{c_J} (1 - p_{(\{J-1\}c+k)}) \right\}.$$

5. IF  $E(T^{(c_{opt})}) \leq E(T^{(c)})$ , return  $c_{opt}$  as the optimal pool size for OD.  
ELSE let  $c_{opt} = c$ ,  $E(T^{(c_{opt})}) = E(T^{(c)})$ , and go to Step 4.

TOD ALGORITHM:

1. Order the  $N$  individuals as in ID.
2. Specify a common pool size  $c_0 > 1$ . Set  $j = J$ ,  $j^* = J + 1$ ,  $p_{J+1(1)} = 1$ , and  $p^* = 0$ .
3. IF  $j \geq 1$ , calculate  $E(T_{\mathcal{P}_j}) = 1 + c_0 \text{pr}(G_j = 1)$ .  
ELSE go to Step 5.
4. IF  $E(T_{\mathcal{P}_j}) \geq c_0$ , let  $j^* = j$ ,  $j = j - 1$ , and go to Step 3.  
ELSE set  $p^* = \frac{1}{2}(p_{j^*-1(c_0)} + p_{j^*(1)})$  and go to Step 5.
5. Return  $p^*$  as the thresholding value.

*Proof of claim that  $E(T_{\mathcal{P}_J}) \geq E(T_{\mathcal{P}_{J-1}}) \geq \dots \geq E(T_{\mathcal{P}_1})$  for TOD.* It suffices to show that  $E(T_{\mathcal{P}_j}) \geq E(T_{\mathcal{P}_{j'}})$ , for all  $j > j'$ , for ID whenever  $c_j \geq c_{j'}$ . This covers the equal pool size case  $c_0$  specified in TOD and the case when  $c_1 < c_0$ . Assume that  $S_e + S_p \geq 1$ . This is not prohibitive since assay tests usually possess values of  $S_e$  and  $S_p$  both close to 1. For ID,

$$E(T_{\mathcal{P}_j}) = 1 + c_j I(c_j > 1) \text{pr}(G_j = 1) \\ E(T_{\mathcal{P}_{j'}}) = 1 + c_{j'} I(c_{j'} > 1) \text{pr}(G_{j'} = 1).$$

If  $c_j = 1$ , the result is obvious. When  $c_j > 1$ , it suffices to show that  $\text{pr}(G_j = 1) \geq \text{pr}(G_{j'} = 1)$ .

From Web Appendix A,

$$\begin{aligned}\text{pr}(G_j = 1) &= S_e - (S_e + S_p - 1) \prod_{k=1}^{c_j} (1 - p_{j(k)}) \\ \text{pr}(G_{j'} = 1) &= S_e - (S_e + S_p - 1) \prod_{k'=1}^{c_{j'}} (1 - p_{j'(k')}).\end{aligned}$$

Therefore, it suffices to show that  $\prod_{k=1}^{c_j} (1 - p_{j(k)}) \leq \prod_{k'=1}^{c_{j'}} (1 - p_{j'(k')})$  since  $S_e + S_p - 1 \geq 0$ .

For  $j > j'$ ,  $0 \leq p_{j'(k')} \leq p_{j(k)} \leq 1$ , for all  $k, k'$ , which implies  $0 \leq 1 - p_{j(k)} \leq 1 - p_{j'(k')} \leq 1$ .

Therefore, for all  $j > j'$ ,  $\prod_{k=1}^{c_j} (1 - p_{j(k)}) \leq \prod_{k=1}^{c_{j'}} (1 - p_{j(k)}) \leq \prod_{k'=1}^{c_{j'}} (1 - p_{j'(k')})$ .  $\square$

PSOD ALGORITHM:

1. Order the  $N$  individuals as in ID.
2. Specify a maximum allowable pool size  $M$ . Let  $j = 1$ ,  $N_j^P = 0$ , and  $N_j^R = N$ .
3. IF  $N_j^P < N$ , go to Step 4.

ELSE END.

4. Let  $c_j^* = 1$  and  $E(T_{\mathcal{P}_j; c_j^*}) = 1$ .
5. Let  $c_j = \min\{c_j^* + 1, N_j^R, M\}$  and calculate

$$E(T_{\mathcal{P}_j; c_j}) = 1 + c_j \left\{ S_e + (1 - S_e - S_p) \prod_{k=1}^{c_j} (1 - p_{(N_j^P + k)}) \right\}.$$

6. IF  $c_j^{*-1} E(T_{\mathcal{P}_j; c_j^*}) \leq c_j^{-1} E(T_{\mathcal{P}_j; c_j})$ , return  $c_j^*$  as the optimal pool size for the  $j$ th pool.

ELSE let  $c_j^* = c_j$ ,  $E(T_{\mathcal{P}_j; c_j^*}) = E(T_{\mathcal{P}_j; c_j})$ , and go to Step 5.

7. Let  $j = j + 1$ ,  $N_j^P = N_{j-1}^P + c_{j-1}$ ,  $N_j^R = N_{j-1}^R - c_{j-1}$ , and go to Step 3.

**Web Appendix C:** *Simulation results for Section 4.* This appendix contains our complete simulation results comparing D, OD, TOD, PSOD, H, and A. In all tables and figures listed below, we use  $N = 1000$  individuals.

|            |                                                                 |         |
|------------|-----------------------------------------------------------------|---------|
| <b>C1:</b> | Methodology for computing accuracy measures and results summary | Page 6  |
| <b>C2:</b> | Accuracy measures for D, OD, TOD, PSOD, H, and A                |         |
| Table 1:   | $S_e = S_p = 0.90, M = 10$                                      | Page 7  |
| Table 2:   | $S_e = S_p = 0.95, M = 10$                                      | Page 8  |
| Table 3:   | $S_e = S_p = 0.99, M = 10$                                      | Page 9  |
| <b>C3:</b> | Efficiency comparisons: Dorfman-based procedures                |         |
| Figure 1:  | OD versus D when $M = 10$                                       | Page 10 |
| Figure 2:  | TOD versus D when $M = 10$                                      | Page 11 |
| Figure 3:  | TOD versus OD when $M = 10$                                     | Page 12 |
| Figure 4:  | PSOD versus D when $M = 10$                                     | Page 13 |
| Figure 5:  | PSOD versus OD when $M = 10$                                    | Page 14 |
| Figure 6:  | PSOD versus TOD when $M = 10$                                   | Page 15 |
| Figure 7:  | PSOD versus H when $M = 10$                                     | Page 16 |
| <b>C4:</b> | Efficiency comparisons: Informative Dorfman procedures and A    |         |
| Figure 8:  | OD versus A when $M = 10$                                       | Page 17 |
| Figure 9:  | OD versus A when $M = 20$                                       | Page 18 |
| Figure 10: | OD versus A when $M = 30$                                       | Page 19 |
| Figure 11: | TOD versus A when $M = 10$                                      | Page 20 |
| Figure 12: | TOD versus A when $M = 20$                                      | Page 21 |
| Figure 13: | TOD versus A when $M = 30$                                      | Page 22 |
| Figure 14: | PSOD versus A when $M = 10$                                     | Page 23 |
| Figure 15: | PSOD versus A when $M = 20$                                     | Page 24 |
| Figure 16: | PSOD versus A when $M = 30$                                     | Page 25 |

METHODOLOGY: We define the pooling sensitivity (specificity),  $PS_e$  ( $PS_p$ ), to be the probability that a randomly selected individual is classified as positive (negative) given that the individual is truly positive (negative). Similarly, we define the pooling positive (negative) predictive value,  $PPV$  ( $NPV$ ), as the probability that a randomly selected individual is truly positive (negative) given that the individual is classified as positive (negative). For the simulations in Section 4, we calculate  $PS_e$ ,  $PS_p$ ,  $PPV$ , and  $NPV$  as measures of classification accuracy for the six procedures. For D and A, these are calculated using the relevant equations in Kim et al. (2007) under the assumption of a common prevalence  $p$ . For OD, TOD, PSOD, and H we calculate

$$\begin{aligned}
 PS_e &= \frac{1}{N} \sum_{j=1}^J \sum_{k=1}^{c_j} PS_e^{\mathcal{I}_{j(k)}} \\
 PS_p &= \frac{1}{N} \sum_{j=1}^J \sum_{k=1}^{c_j} PS_p^{\mathcal{I}_{j(k)}} \\
 PPV &= \frac{1}{N} \sum_{j=1}^J \sum_{k=1}^{c_j} PPV^{\mathcal{I}_{j(k)}} \\
 NPV &= \frac{1}{N} \sum_{j=1}^J \sum_{k=1}^{c_j} NPV^{\mathcal{I}_{j(k)}}.
 \end{aligned}$$

In contrast to the individual-specific measures derived in Section 2.2, reporting  $PS_e$ ,  $PS_p$ ,  $PPV$ , and  $NPV$  in this way (for OD, TOD, PSOD, and H) allows us to characterize global performance.

SUMMARY: Tables 1-3 list values of  $PS_e$ ,  $PS_p$ ,  $PPV$ , and  $NPV$  for D, OD, TOD, PSOD, H, and A, when  $M = 10$  and  $N = 1000$ , for different values of  $p$ , and  $S_e = S_p$ . Using larger values of  $M$  produced similar results. In summary, note that  $PS_e = S_e^2$  for all Dorfman procedures when  $p < 0.1$ . When  $p \geq 0.1$ ,  $PS_e$  can be larger than  $S_e^2$  for TOD, PSOD, and H. This is caused by the propensity to specify that high risk subjects are to be screened individually. It is also worth noting that when  $p \geq 0.3$ , the noninformative D algorithm reverts to individual testing so that  $PS_e = S_e$ . In general, all Dorfman procedures tend to have identical or larger values of  $PS_e$  and  $NPV$  when compared to A. In contrast, A tends to have larger values of  $PS_p$  when compared to all Dorfman procedures, and D and A tend to produce larger values of  $PPV$ .

Table 1: Measures of accuracy for D, OD, TOD, PSOD, H, and A when  $M = 10$ ,  $N = 1000$ , and  $S_e = S_p = 0.90$ .

|        |        | Measures of Accuracy |       |       |       |       |       |       |
|--------|--------|----------------------|-------|-------|-------|-------|-------|-------|
|        |        | $p$                  | D     | OD    | TOD   | PSOD  | H     | A     |
| $PS_e$ | 0.0001 | 0.810                | 0.810 | 0.810 | 0.810 | 0.810 | 0.810 | 0.791 |
|        | 0.001  | 0.810                | 0.810 | 0.810 | 0.810 | 0.810 | 0.810 | 0.787 |
|        | 0.01   | 0.810                | 0.810 | 0.810 | 0.810 | 0.810 | 0.810 | 0.757 |
|        | 0.02   | 0.810                | 0.810 | 0.810 | 0.810 | 0.810 | 0.810 | 0.742 |
|        | 0.05   | 0.810                | 0.810 | 0.810 | 0.810 | 0.810 | 0.810 | 0.730 |
|        | 0.10   | 0.810                | 0.810 | 0.813 | 0.814 | 0.814 | 0.814 | 0.731 |
|        | 0.20   | 0.810                | 0.810 | 0.826 | 0.832 | 0.832 | 0.832 | 0.729 |
|        | 0.30   | 0.900                | 0.810 | 0.843 | 0.849 | 0.849 | 0.849 | 0.729 |
| $PS_p$ | 0.0001 | 0.990                | 0.990 | 0.990 | 0.990 | 0.990 | 0.990 | 0.992 |
|        | 0.001  | 0.989                | 0.989 | 0.989 | 0.989 | 0.989 | 0.989 | 0.992 |
|        | 0.01   | 0.983                | 0.984 | 0.984 | 0.984 | 0.984 | 0.985 | 0.994 |
|        | 0.02   | 0.978                | 0.979 | 0.979 | 0.981 | 0.982 | 0.982 | 0.993 |
|        | 0.05   | 0.972                | 0.970 | 0.970 | 0.975 | 0.977 | 0.977 | 0.984 |
|        | 0.10   | 0.968                | 0.965 | 0.965 | 0.966 | 0.969 | 0.969 | 0.977 |
|        | 0.20   | 0.951                | 0.951 | 0.947 | 0.949 | 0.952 | 0.952 | 0.959 |
|        | 0.30   | 0.900                | 0.934 | 0.935 | 0.936 | 0.938 | 0.938 | 0.925 |
| $PPV$  | 0.0001 | 0.008                | 0.008 | 0.008 | 0.008 | 0.008 | 0.008 | 0.010 |
|        | 0.001  | 0.070                | 0.062 | 0.062 | 0.062 | 0.062 | 0.062 | 0.094 |
|        | 0.01   | 0.326                | 0.261 | 0.261 | 0.269 | 0.273 | 0.273 | 0.560 |
|        | 0.02   | 0.430                | 0.361 | 0.361 | 0.376 | 0.385 | 0.385 | 0.688 |
|        | 0.05   | 0.603                | 0.508 | 0.508 | 0.525 | 0.540 | 0.540 | 0.709 |
|        | 0.10   | 0.740                | 0.633 | 0.633 | 0.627 | 0.644 | 0.644 | 0.781 |
|        | 0.20   | 0.805                | 0.726 | 0.724 | 0.728 | 0.741 | 0.741 | 0.817 |
|        | 0.30   | 0.794                | 0.754 | 0.777 | 0.781 | 0.791 | 0.791 | 0.806 |
| $NPV$  | 0.0001 | 1.000                | 1.000 | 1.000 | 1.000 | 1.000 | 1.000 | 1.000 |
|        | 0.001  | 1.000                | 1.000 | 1.000 | 1.000 | 1.000 | 1.000 | 1.000 |
|        | 0.01   | 0.998                | 0.998 | 0.998 | 0.998 | 0.998 | 0.998 | 0.998 |
|        | 0.02   | 0.996                | 0.996 | 0.996 | 0.996 | 0.996 | 0.996 | 0.995 |
|        | 0.05   | 0.990                | 0.989 | 0.989 | 0.989 | 0.989 | 0.989 | 0.986 |
|        | 0.10   | 0.979                | 0.976 | 0.978 | 0.979 | 0.979 | 0.979 | 0.970 |
|        | 0.20   | 0.952                | 0.945 | 0.956 | 0.959 | 0.959 | 0.959 | 0.934 |
|        | 0.30   | 0.955                | 0.894 | 0.926 | 0.929 | 0.929 | 0.929 | 0.888 |

Table 2: Measures of accuracy for D, OD, TOD, PSOD, H, and A when  $M = 10$ ,  $N = 1000$ , and  $S_e = S_p = 0.95$ .

|        |        | Measures of Accuracy |       |       |       |       |       |       |
|--------|--------|----------------------|-------|-------|-------|-------|-------|-------|
|        |        | $p$                  | D     | OD    | TOD   | PSOD  | H     | A     |
| $PS_e$ | 0.0001 | 0.903                | 0.902 | 0.902 | 0.902 | 0.902 | 0.902 | 0.914 |
|        | 0.001  | 0.903                | 0.902 | 0.902 | 0.902 | 0.902 | 0.902 | 0.910 |
|        | 0.01   | 0.903                | 0.902 | 0.902 | 0.902 | 0.902 | 0.902 | 0.882 |
|        | 0.02   | 0.903                | 0.903 | 0.903 | 0.903 | 0.903 | 0.903 | 0.868 |
|        | 0.05   | 0.903                | 0.903 | 0.903 | 0.903 | 0.903 | 0.903 | 0.858 |
|        | 0.10   | 0.903                | 0.902 | 0.905 | 0.905 | 0.905 | 0.905 | 0.858 |
|        | 0.20   | 0.903                | 0.903 | 0.914 | 0.915 | 0.915 | 0.915 | 0.859 |
|        | 0.30   | 0.950                | 0.902 | 0.924 | 0.924 | 0.924 | 0.924 | 0.948 |
| $PS_p$ | 0.0001 | 0.997                | 0.997 | 0.997 | 0.997 | 0.997 | 0.997 | 0.997 |
|        | 0.001  | 0.997                | 0.997 | 0.997 | 0.997 | 0.997 | 0.997 | 0.997 |
|        | 0.01   | 0.994                | 0.994 | 0.994 | 0.994 | 0.994 | 0.994 | 0.998 |
|        | 0.02   | 0.992                | 0.991 | 0.991 | 0.993 | 0.993 | 0.993 | 0.997 |
|        | 0.05   | 0.989                | 0.989 | 0.989 | 0.990 | 0.990 | 0.990 | 0.993 |
|        | 0.10   | 0.985                | 0.983 | 0.983 | 0.985 | 0.985 | 0.985 | 0.989 |
|        | 0.20   | 0.981                | 0.978 | 0.975 | 0.976 | 0.976 | 0.976 | 0.983 |
|        | 0.30   | 0.950                | 0.969 | 0.968 | 0.969 | 0.969 | 0.969 | 0.995 |
| $PPV$  | 0.0001 | 0.034                | 0.034 | 0.034 | 0.034 | 0.034 | 0.034 | 0.029 |
|        | 0.001  | 0.237                | 0.197 | 0.197 | 0.197 | 0.197 | 0.197 | 0.238 |
|        | 0.01   | 0.588                | 0.492 | 0.492 | 0.504 | 0.506 | 0.506 | 0.809 |
|        | 0.02   | 0.686                | 0.590 | 0.590 | 0.605 | 0.609 | 0.609 | 0.875 |
|        | 0.05   | 0.814                | 0.723 | 0.723 | 0.713 | 0.718 | 0.718 | 0.860 |
|        | 0.10   | 0.872                | 0.811 | 0.810 | 0.805 | 0.810 | 0.810 | 0.895 |
|        | 0.20   | 0.923                | 0.878 | 0.875 | 0.866 | 0.869 | 0.869 | 0.927 |
|        | 0.30   | 0.891                | 0.892 | 0.901 | 0.897 | 0.898 | 0.898 | 0.988 |
| $NPV$  | 0.0001 | 1.000                | 1.000 | 1.000 | 1.000 | 1.000 | 1.000 | 1.000 |
|        | 0.001  | 1.000                | 1.000 | 1.000 | 1.000 | 1.000 | 1.000 | 1.000 |
|        | 0.01   | 0.999                | 0.999 | 0.999 | 0.999 | 0.999 | 0.999 | 0.999 |
|        | 0.02   | 0.998                | 0.998 | 0.998 | 0.998 | 0.998 | 0.998 | 0.997 |
|        | 0.05   | 0.995                | 0.995 | 0.995 | 0.995 | 0.995 | 0.995 | 0.993 |
|        | 0.10   | 0.989                | 0.987 | 0.989 | 0.989 | 0.989 | 0.989 | 0.984 |
|        | 0.20   | 0.976                | 0.968 | 0.977 | 0.977 | 0.977 | 0.977 | 0.965 |
|        | 0.30   | 0.978                | 0.937 | 0.960 | 0.960 | 0.960 | 0.960 | 0.978 |



Table 3: Measures of accuracy for D, OD, TOD, PSOD, H, and A when  $M = 10$ ,  $N = 1000$ , and  $S_e = S_p = 0.99$ .

|        |        | Measures of Accuracy |       |       |       |       |       |       |
|--------|--------|----------------------|-------|-------|-------|-------|-------|-------|
|        |        | $p$                  | D     | OD    | TOD   | PSOD  | H     | A     |
| $PS_e$ | 0.0001 | 0.980                | 0.980 | 0.980 | 0.980 | 0.980 | 0.980 | 0.988 |
|        | 0.001  | 0.980                | 0.980 | 0.980 | 0.980 | 0.980 | 0.980 | 0.987 |
|        | 0.01   | 0.980                | 0.980 | 0.980 | 0.980 | 0.980 | 0.980 | 0.978 |
|        | 0.02   | 0.980                | 0.980 | 0.980 | 0.980 | 0.980 | 0.980 | 0.973 |
|        | 0.05   | 0.980                | 0.980 | 0.980 | 0.980 | 0.980 | 0.980 | 0.970 |
|        | 0.10   | 0.980                | 0.980 | 0.980 | 0.980 | 0.980 | 0.980 | 0.971 |
|        | 0.20   | 0.980                | 0.980 | 0.983 | 0.983 | 0.983 | 0.983 | 0.971 |
|        | 0.30   | 0.990                | 0.980 | 0.985 | 0.984 | 0.984 | 0.984 | 0.990 |
| $PS_p$ | 0.0001 | 1.000                | 1.000 | 1.000 | 1.000 | 1.000 | 1.000 | 1.000 |
|        | 0.001  | 1.000                | 1.000 | 1.000 | 1.000 | 1.000 | 1.000 | 1.000 |
|        | 0.01   | 0.999                | 0.999 | 0.999 | 0.999 | 0.999 | 0.999 | 1.000 |
|        | 0.02   | 0.999                | 0.999 | 0.999 | 0.999 | 0.999 | 0.999 | 1.000 |
|        | 0.05   | 0.998                | 0.998 | 0.998 | 0.998 | 0.998 | 0.998 | 0.999 |
|        | 0.10   | 0.997                | 0.997 | 0.997 | 0.998 | 0.998 | 0.998 | 0.998 |
|        | 0.20   | 0.996                | 0.996 | 0.995 | 0.995 | 0.995 | 0.995 | 0.997 |
|        | 0.30   | 0.990                | 0.994 | 0.994 | 0.994 | 0.994 | 0.994 | 1.000 |
| $PPV$  | 0.0001 | 0.474                | 0.379 | 0.379 | 0.379 | 0.379 | 0.379 | 0.354 |
|        | 0.001  | 0.839                | 0.734 | 0.734 | 0.734 | 0.734 | 0.734 | 0.854 |
|        | 0.01   | 0.913                | 0.886 | 0.886 | 0.891 | 0.892 | 0.892 | 0.984 |
|        | 0.02   | 0.935                | 0.921 | 0.921 | 0.919 | 0.919 | 0.919 | 0.984 |
|        | 0.05   | 0.964                | 0.948 | 0.948 | 0.942 | 0.942 | 0.942 | 0.974 |
|        | 0.10   | 0.975                | 0.963 | 0.963 | 0.958 | 0.959 | 0.959 | 0.980 |
|        | 0.20   | 0.985                | 0.977 | 0.976 | 0.972 | 0.972 | 0.972 | 0.986 |
|        | 0.30   | 0.977                | 0.978 | 0.981 | 0.979 | 0.979 | 0.979 | 1.000 |
| $NPV$  | 0.0001 | 1.000                | 1.000 | 1.000 | 1.000 | 1.000 | 1.000 | 1.000 |
|        | 0.001  | 1.000                | 1.000 | 1.000 | 1.000 | 1.000 | 1.000 | 1.000 |
|        | 0.01   | 1.000                | 1.000 | 1.000 | 1.000 | 1.000 | 1.000 | 1.000 |
|        | 0.02   | 1.000                | 1.000 | 1.000 | 1.000 | 1.000 | 1.000 | 0.999 |
|        | 0.05   | 0.999                | 0.999 | 0.999 | 0.999 | 0.999 | 0.999 | 0.998 |
|        | 0.10   | 0.998                | 0.998 | 0.998 | 0.998 | 0.998 | 0.998 | 0.997 |
|        | 0.20   | 0.995                | 0.993 | 0.996 | 0.995 | 0.995 | 0.995 | 0.993 |
|        | 0.30   | 0.996                | 0.987 | 0.992 | 0.992 | 0.992 | 0.992 | 0.996 |

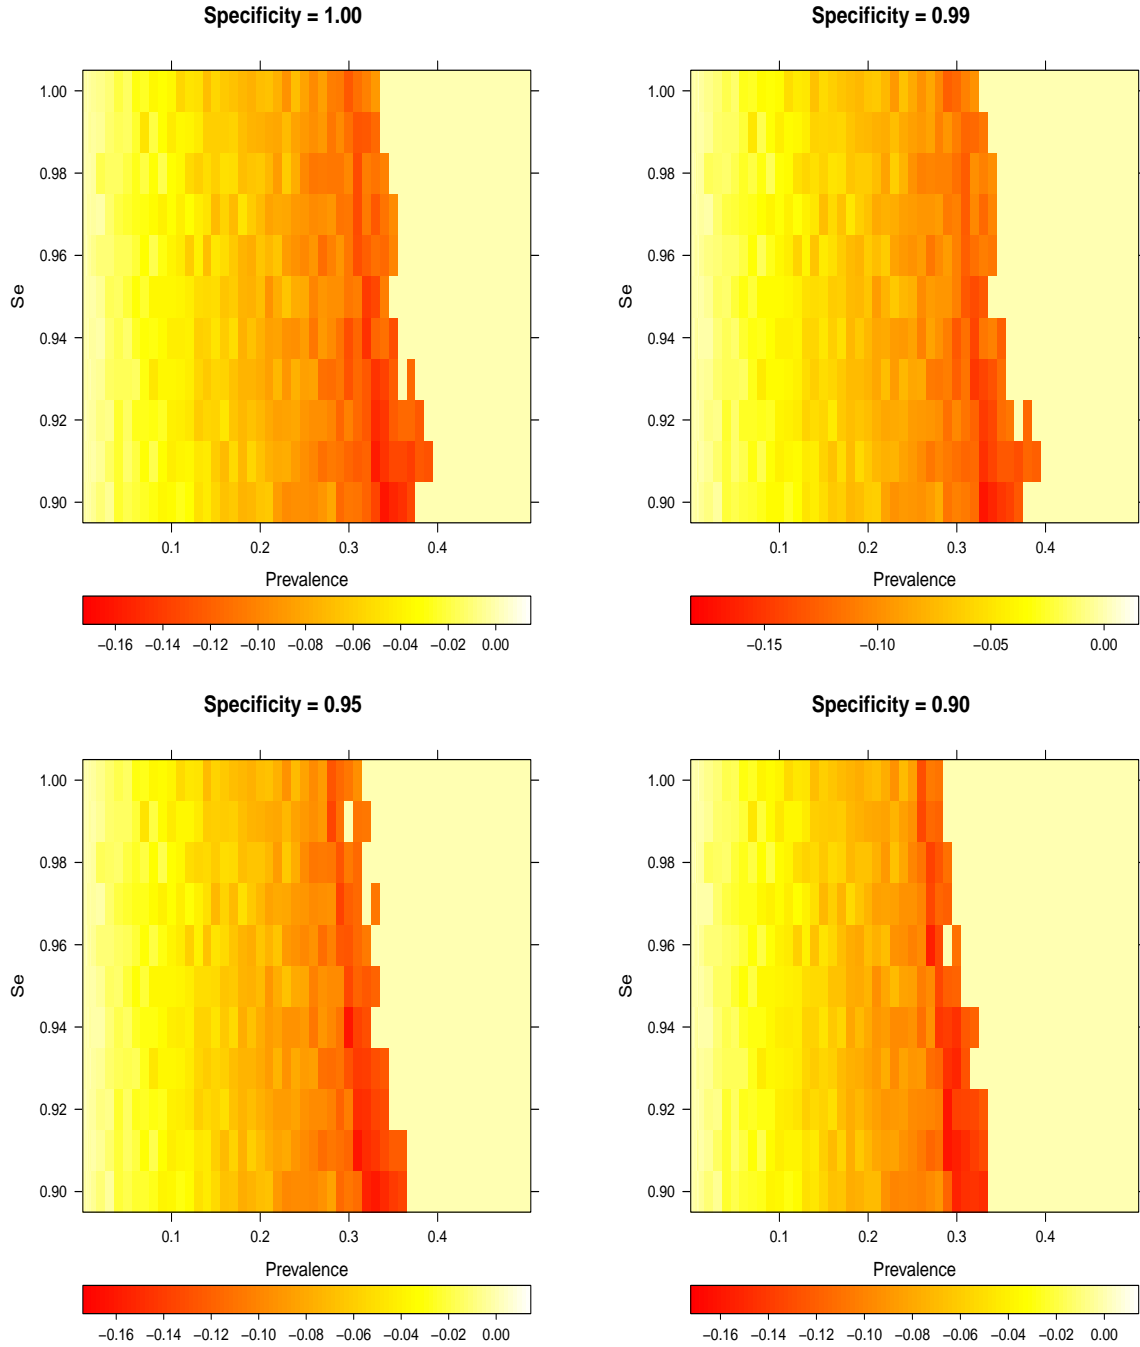

Figure 1: Comparison of OD and D, when  $M = 10$  and  $N = 1000$ , using different levels of  $S_e$ ,  $S_p$ , and  $p$ . Each figure displays values of  $\{E(T|OD) - E(T|D)\}/N$ , the difference in expected individual expenditure between OD and D. Negative values mean that OD is more efficient; the optimal size for D has been used throughout.

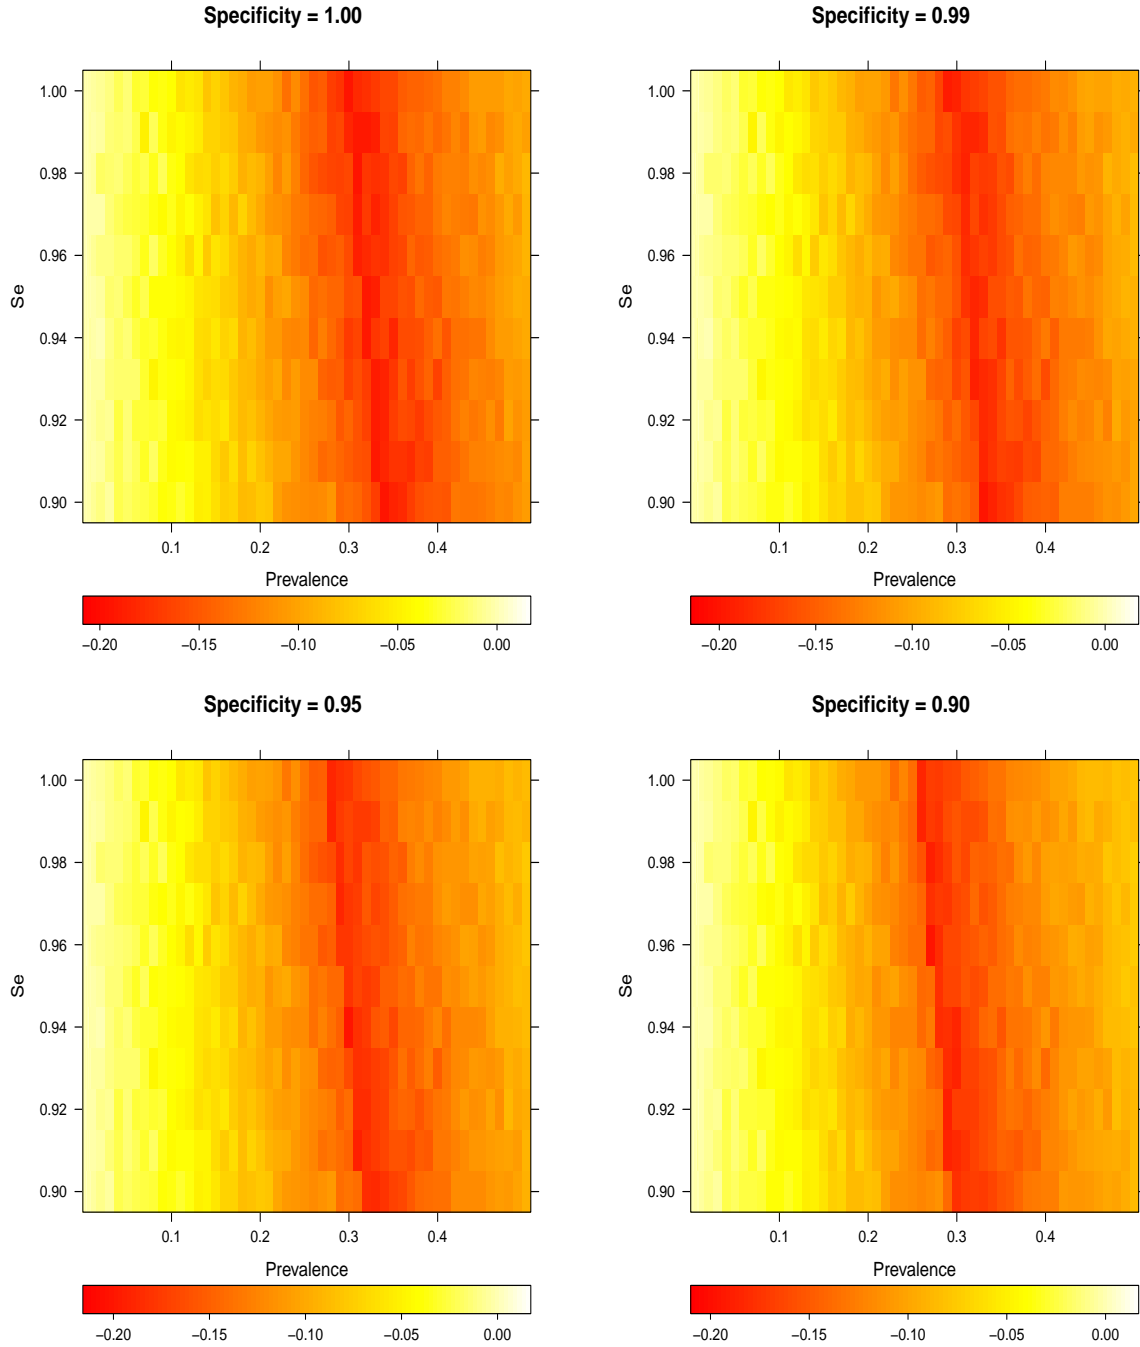

Figure 2: Comparison of TOD and D, when  $M = 10$  and  $N = 1000$ , using different levels of  $S_e$ ,  $S_p$ , and  $p$ . Each figure displays values of  $\{E(T|TOD) - E(T|D)\}/N$ , the difference in expected individual expenditure between TOD and D. Negative values mean that TOD is more efficient; the optimal size for D has been used throughout.

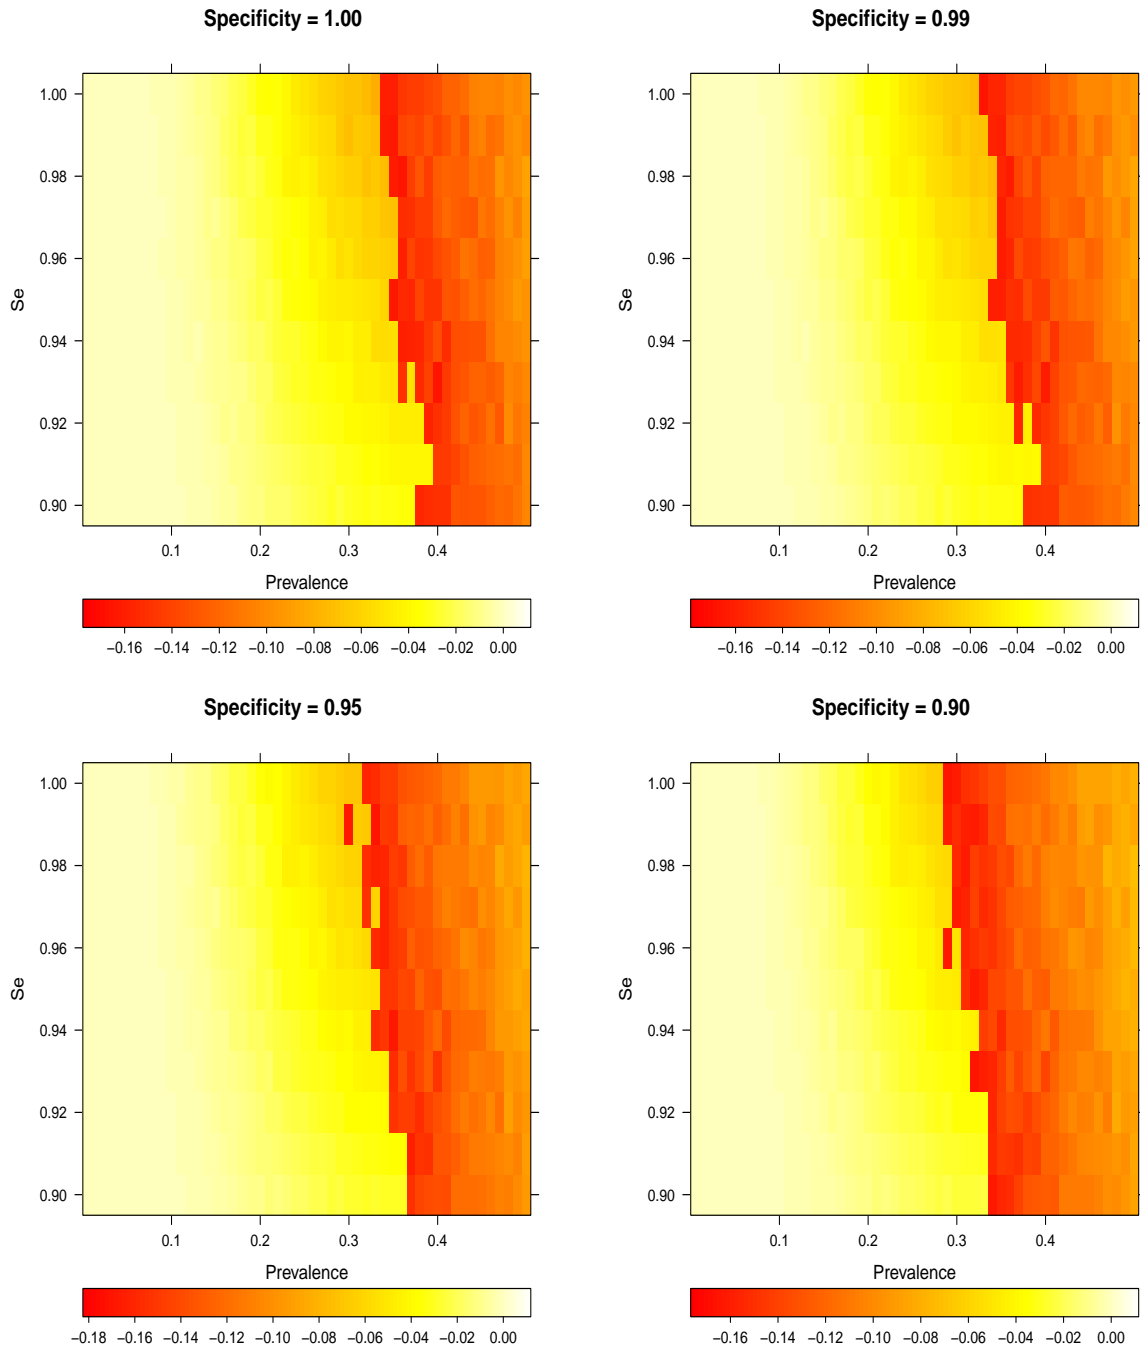

Figure 3: Comparison of TOD and OD, when  $M = 10$  and  $N = 1000$ , using different levels of  $S_e$ ,  $S_p$ , and  $p$ . Each figure displays values of  $\{E(T|TOD) - E(T|OD)\}/N$ , the difference in expected individual expenditure between TOD and OD. Negative values mean that TOD is more efficient.

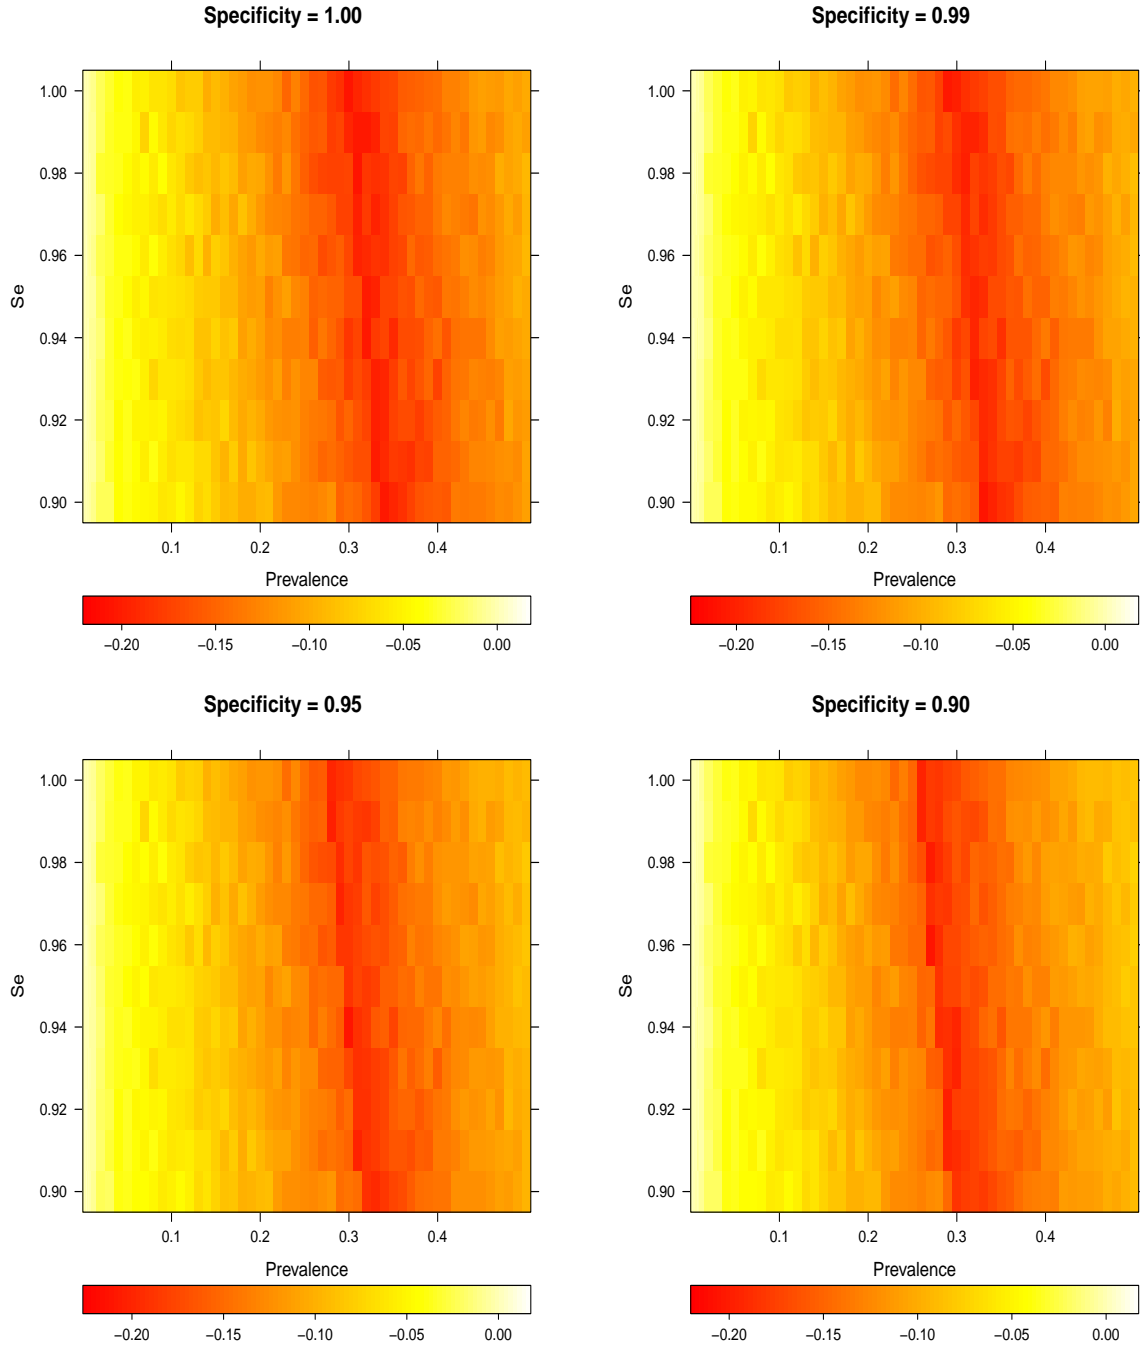

Figure 4: Comparison of PSOD and D, when  $M = 10$  and  $N = 1000$ , using different levels of  $S_e$ ,  $S_p$ , and  $p$ . Each figure displays values of  $\{E(T|PSOD) - E(T|D)\}/N$ , the difference in expected individual expenditure between PSOD and D. Negative values mean that PSOD is more efficient; the optimal size for D has been used throughout.

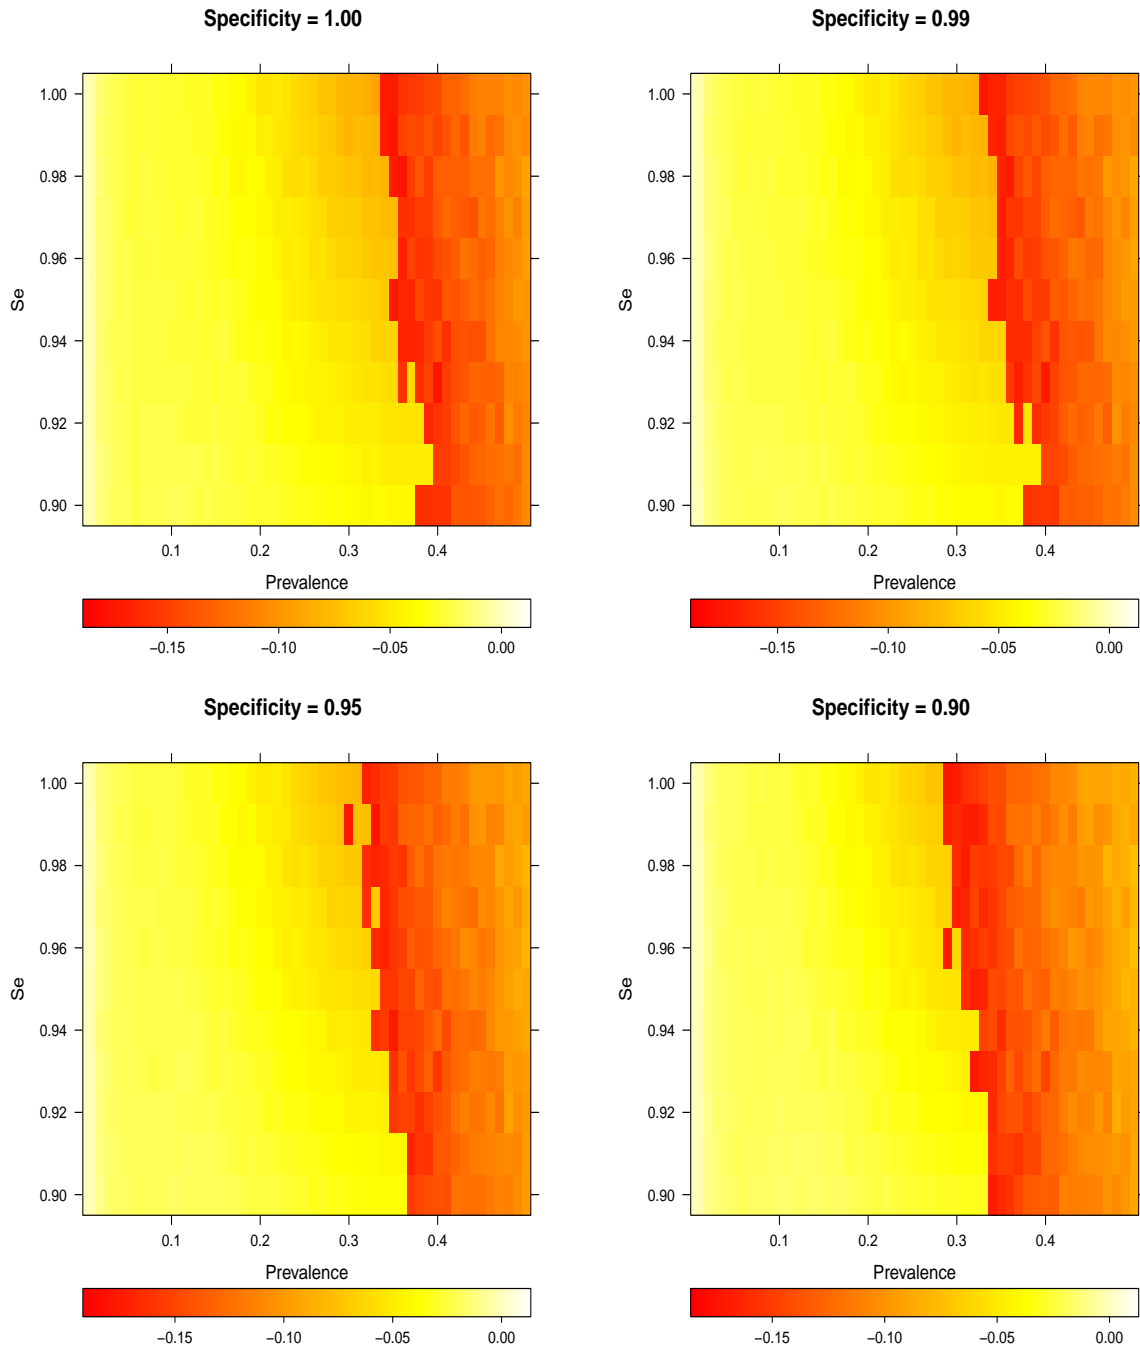

Figure 5: Comparison of PSOD and OD, when  $M = 10$  and  $N = 1000$ , using different levels of  $S_e$ ,  $S_p$ , and  $p$ . Each figure displays values of  $\{E(T|PSOD) - E(T|OD)\}/N$ , the difference in expected individual expenditure between PSOD and OD. Negative values mean that PSOD is more efficient.

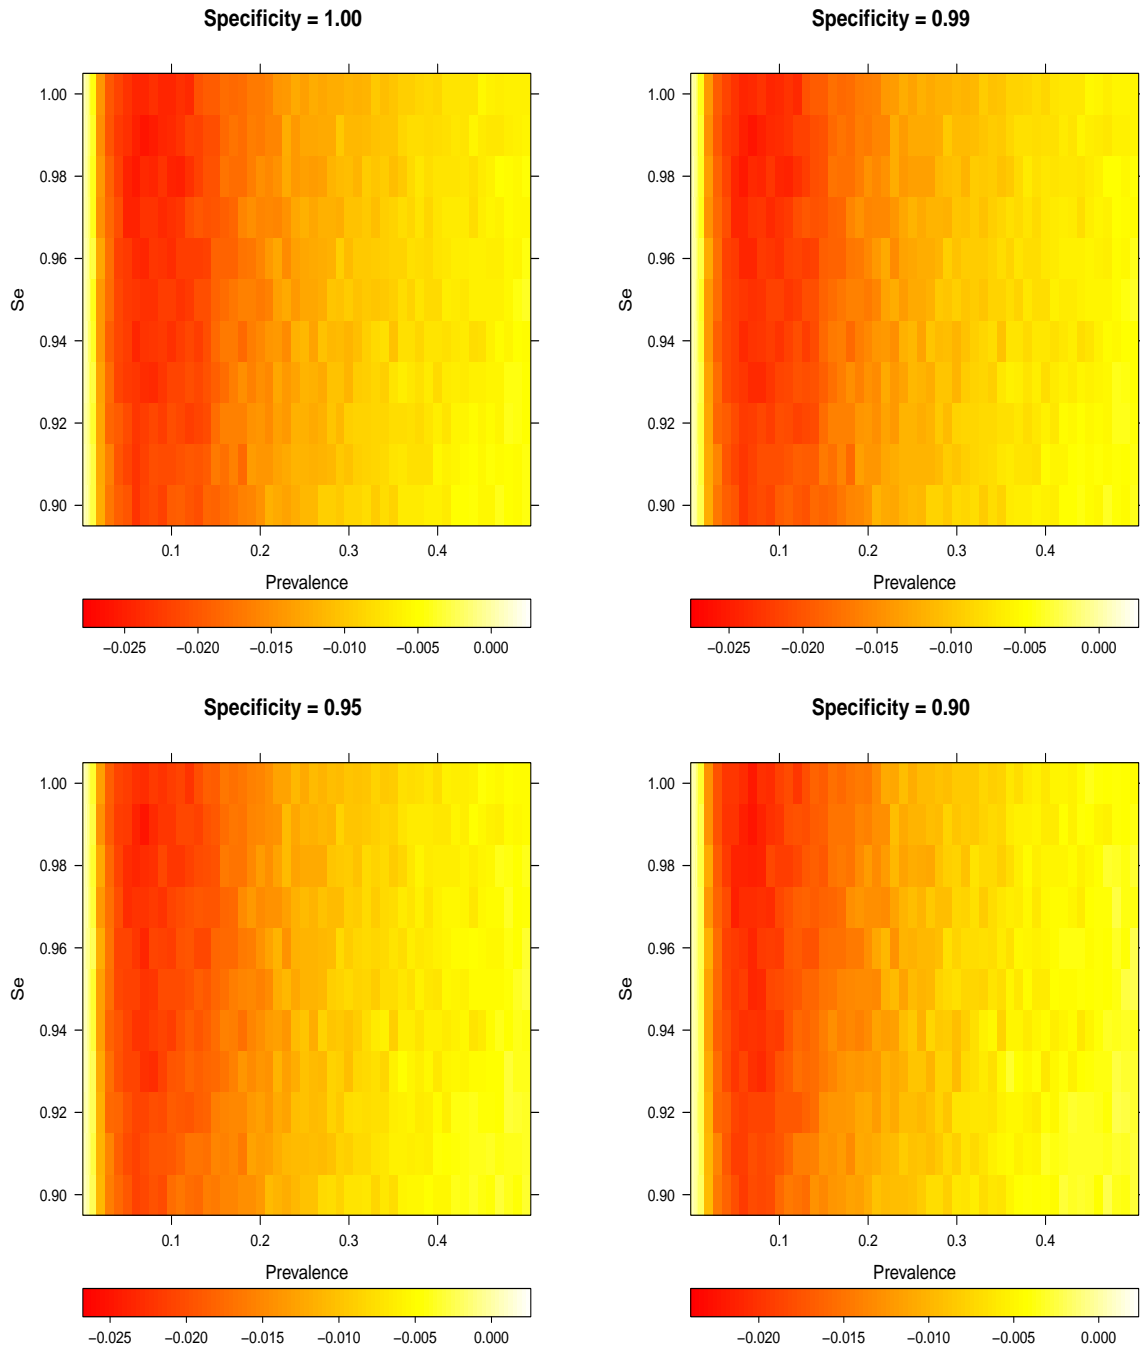

Figure 6: Comparison of PSOD and TOD, when  $M = 10$  and  $N = 1000$ , using different levels of  $S_e$ ,  $S_p$ , and  $p$ . Each figure displays values of  $\{E(T|\text{PSOD}) - E(T|\text{TOD})\}/N$ , the difference in expected individual expenditure between PSOD and TOD. Negative values mean that PSOD is more efficient.

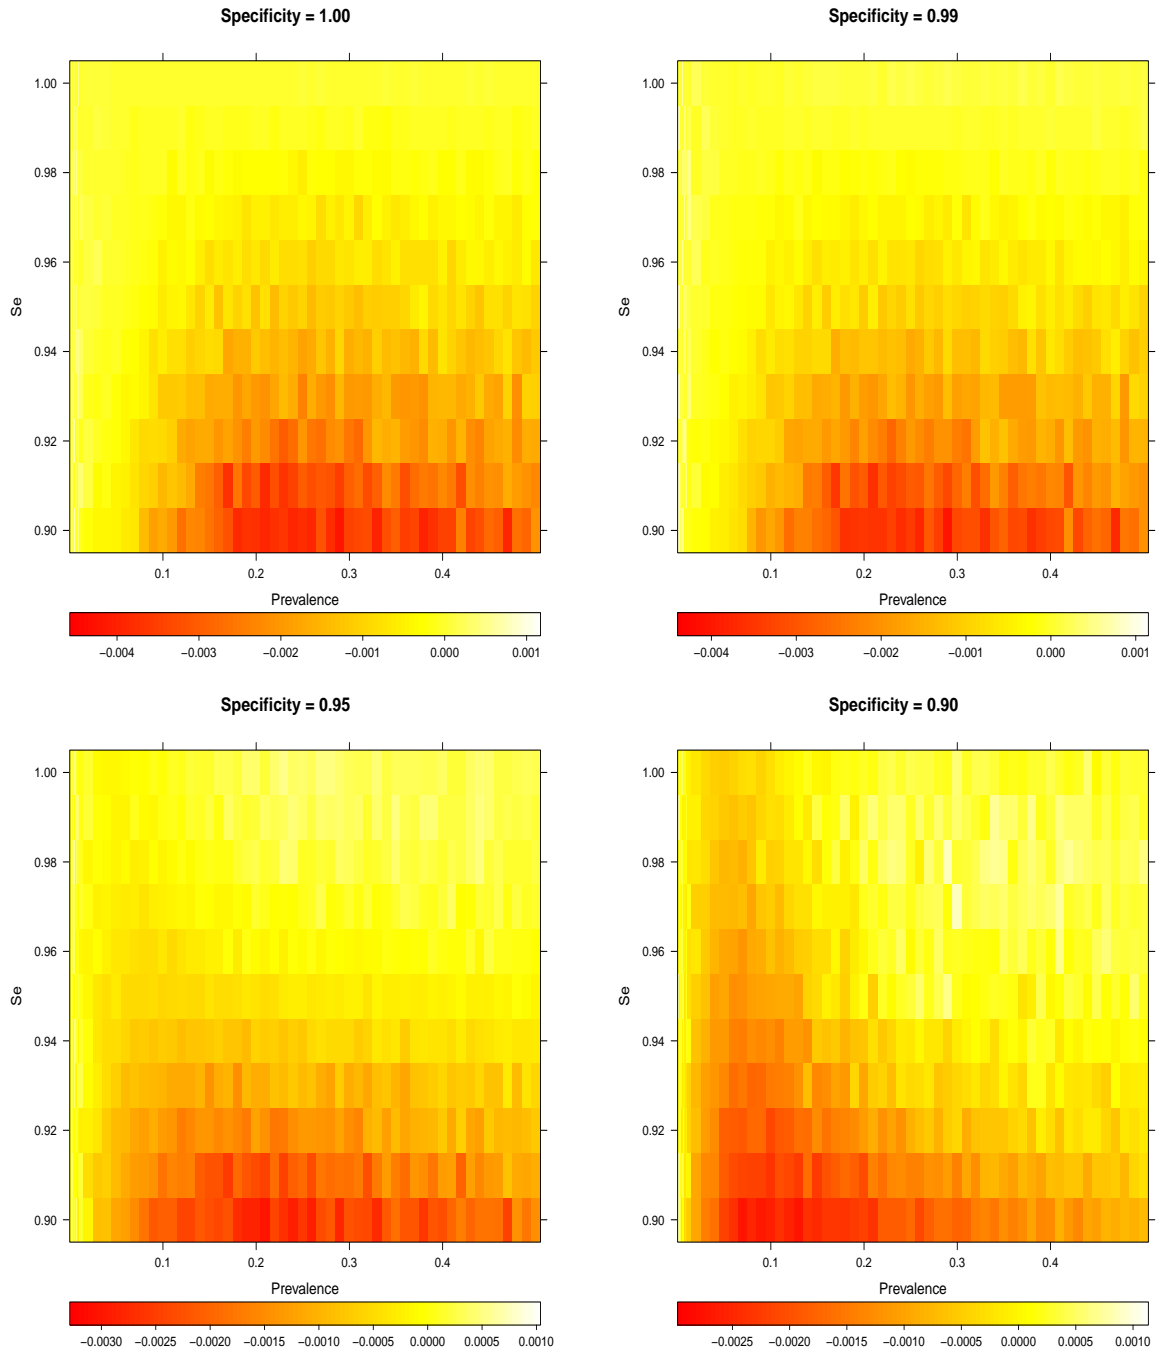

Figure 7: Comparison of PSOD and H, when  $M = 10$  and  $N = 1000$ , using different levels of  $S_e$ ,  $S_p$ , and  $p$ . Each figure displays values of  $\{E(T|\text{PSOD}) - E(T|\text{H})\}/N$ , the difference in expected individual expenditure between PSOD and H. Negative values mean that PSOD is more efficient.



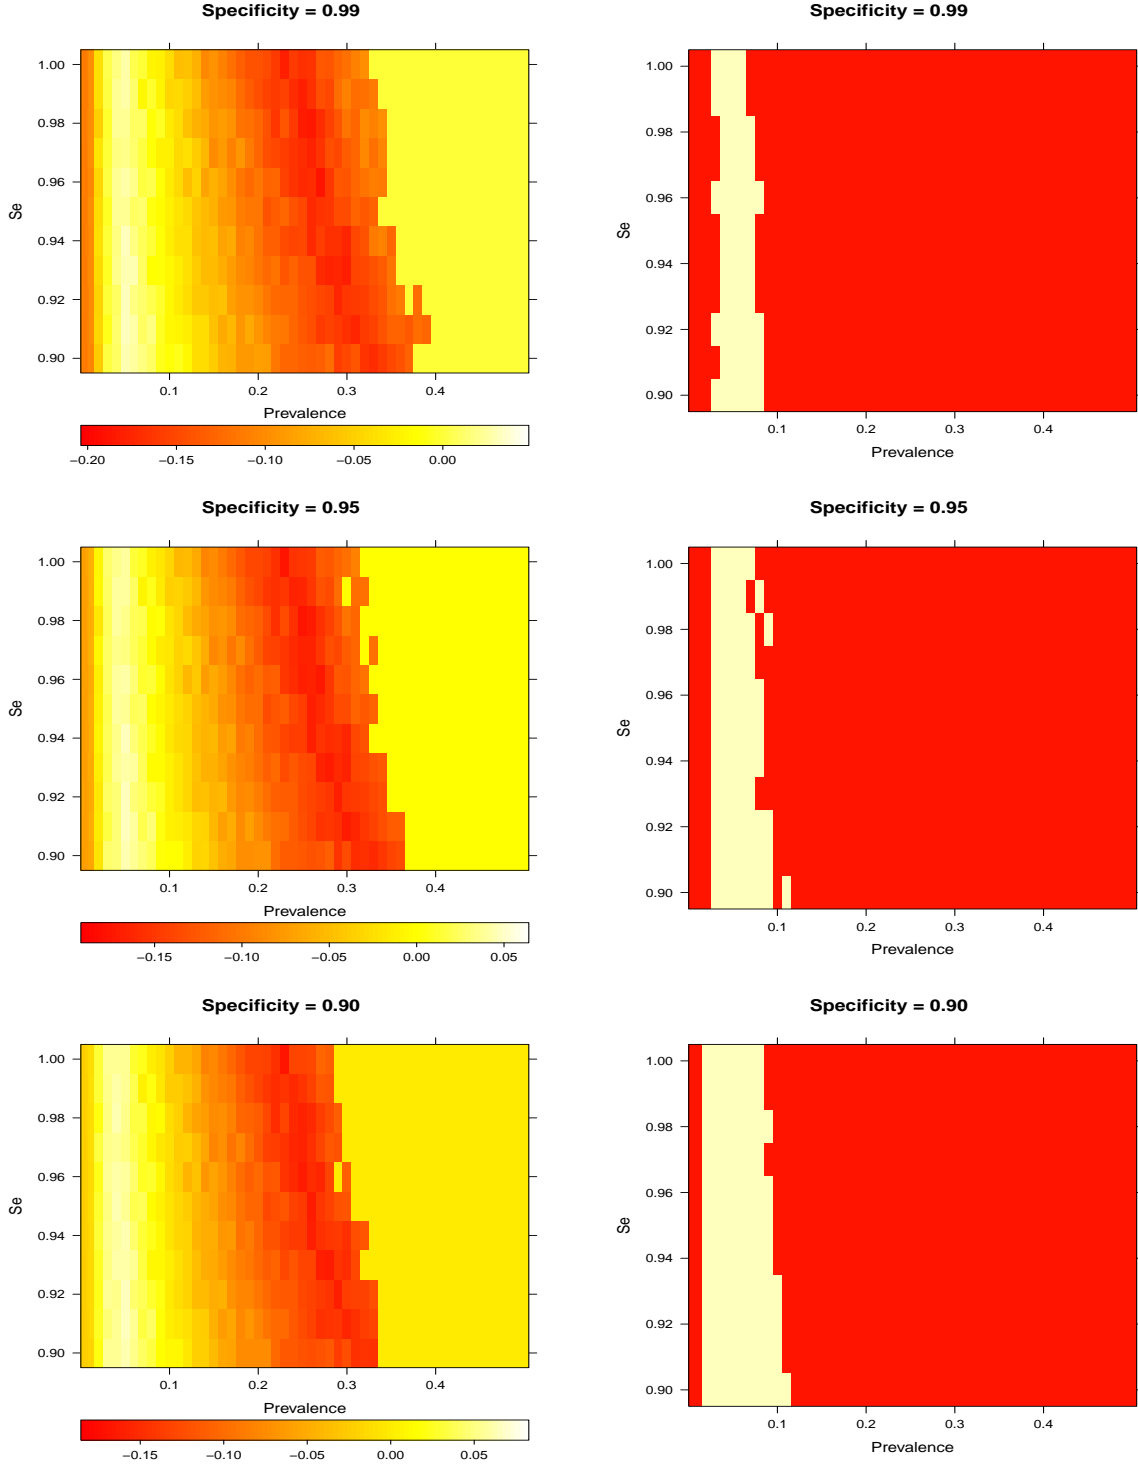

Figure 8: Comparison of OD and A, when  $M = 10$  and  $N = 1000$ , using different levels of  $S_e$ ,  $S_p$ , and  $p$ . Left: Values of  $\{E(T|OD) - E(T|A)\}/N$ , the difference in expected individual expenditure between OD and A. Negative values mean that OD is more efficient. Right: Binary versions of the corresponding figure on the left; regions in red indicate those settings where OD is more efficient. The optimal array size for A has been used throughout.

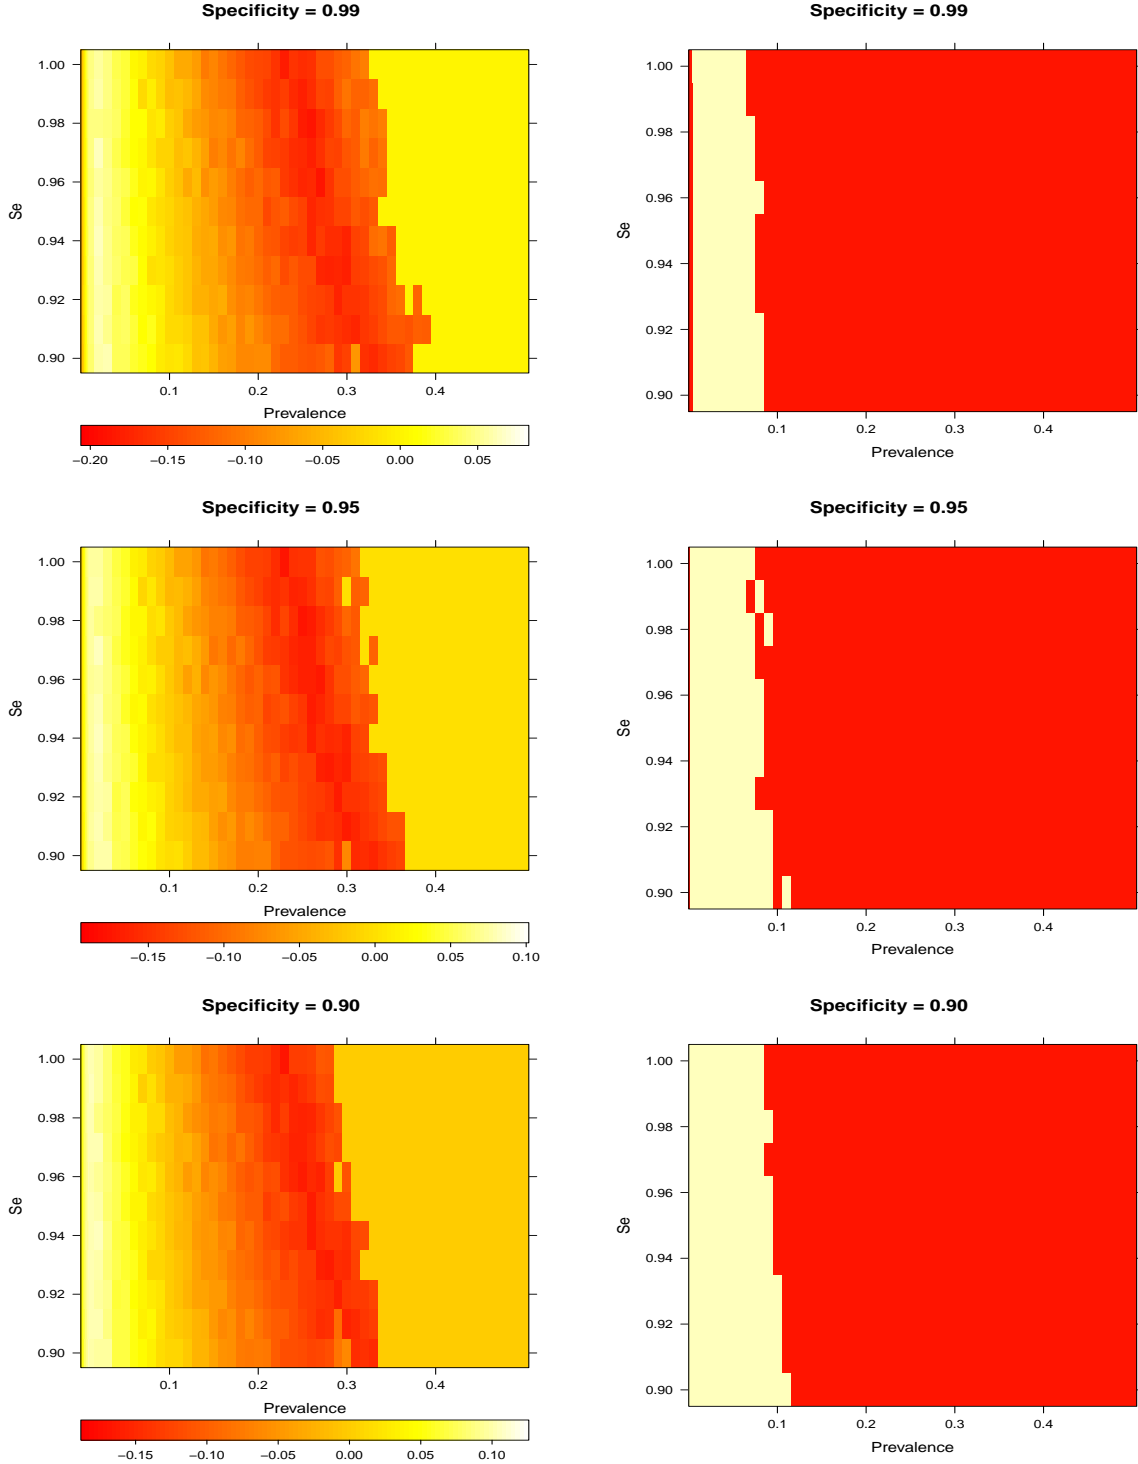

Figure 9: Comparison of OD and A, when  $M = 20$  and  $N = 1000$ , using different levels of  $S_e$ ,  $S_p$ , and  $p$ . Left: Values of  $\{E(T|OD) - E(T|A)\}/N$ , the difference in expected individual expenditure between OD and A. Negative values mean that OD is more efficient. Right: Binary versions of the corresponding figure on the left; regions in red indicate those settings where OD is more efficient. The optimal array size for A has been used throughout.

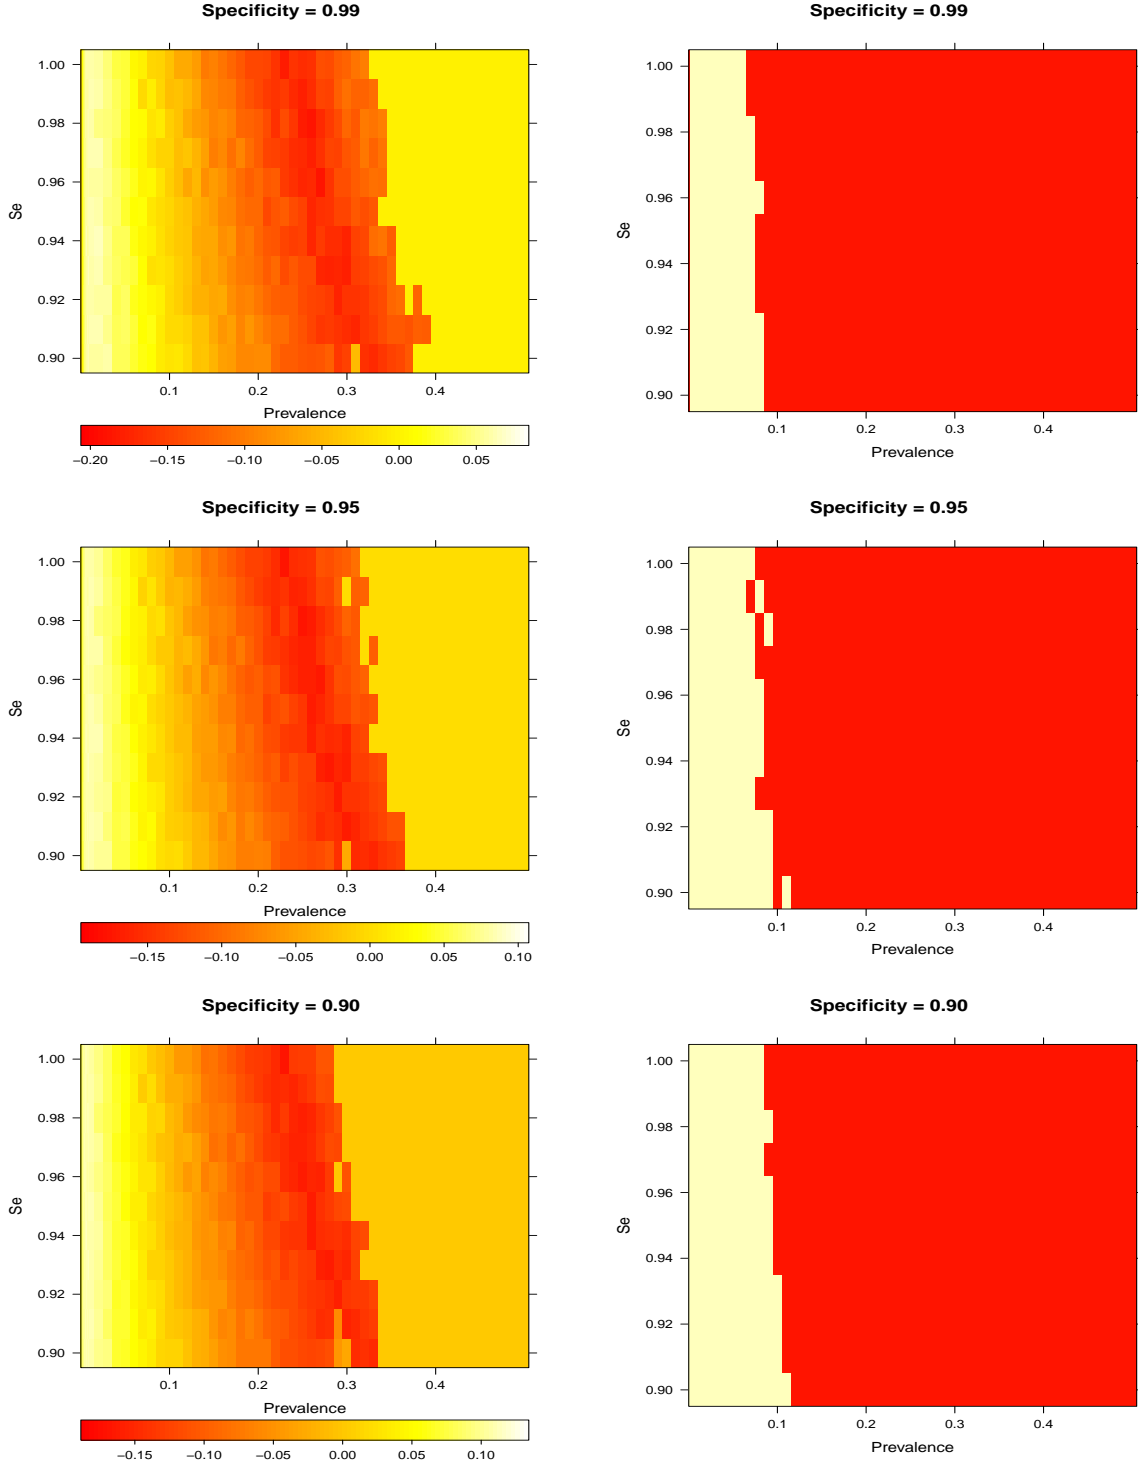

Figure 10: Comparison of OD and A, when  $M = 30$  and  $N = 1000$ , using different levels of  $S_e$ ,  $S_p$ , and  $p$ . Left: Values of  $\{E(T|OD) - E(T|A)\}/N$ , the difference in expected individual expenditure between OD and A. Negative values mean that OD is more efficient. Right: Binary versions of the corresponding figure on the left; regions in red indicate those settings where OD is more efficient. The optimal array size for A has been used throughout.

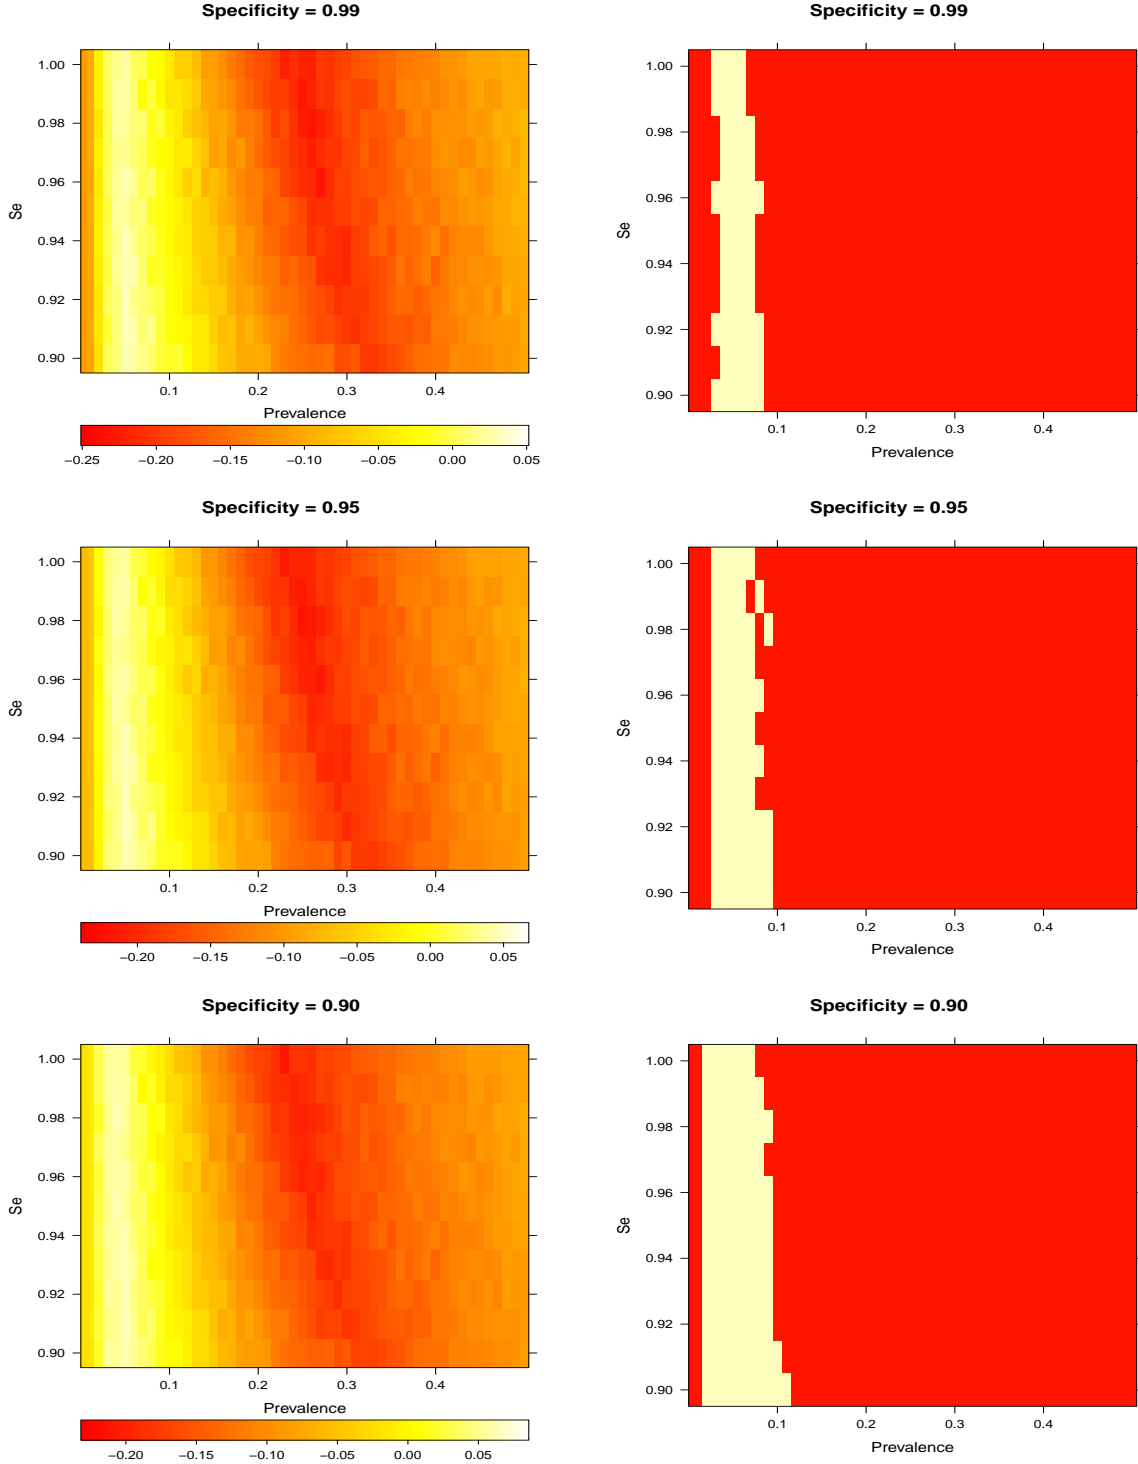

Figure 11: Comparison of TOD and A, when  $M = 10$  and  $N = 1000$ , using different levels of  $S_e$ ,  $S_p$ , and  $p$ . Left: Values of  $\{E(T|TOD) - E(T|A)\}/N$ , the difference in expected individual expenditure between TOD and A. Negative values mean that TOD is more efficient. Right: Binary versions of the corresponding figure on the left; regions in red indicate those settings where TOD is more efficient. The optimal array size for A has been used throughout.

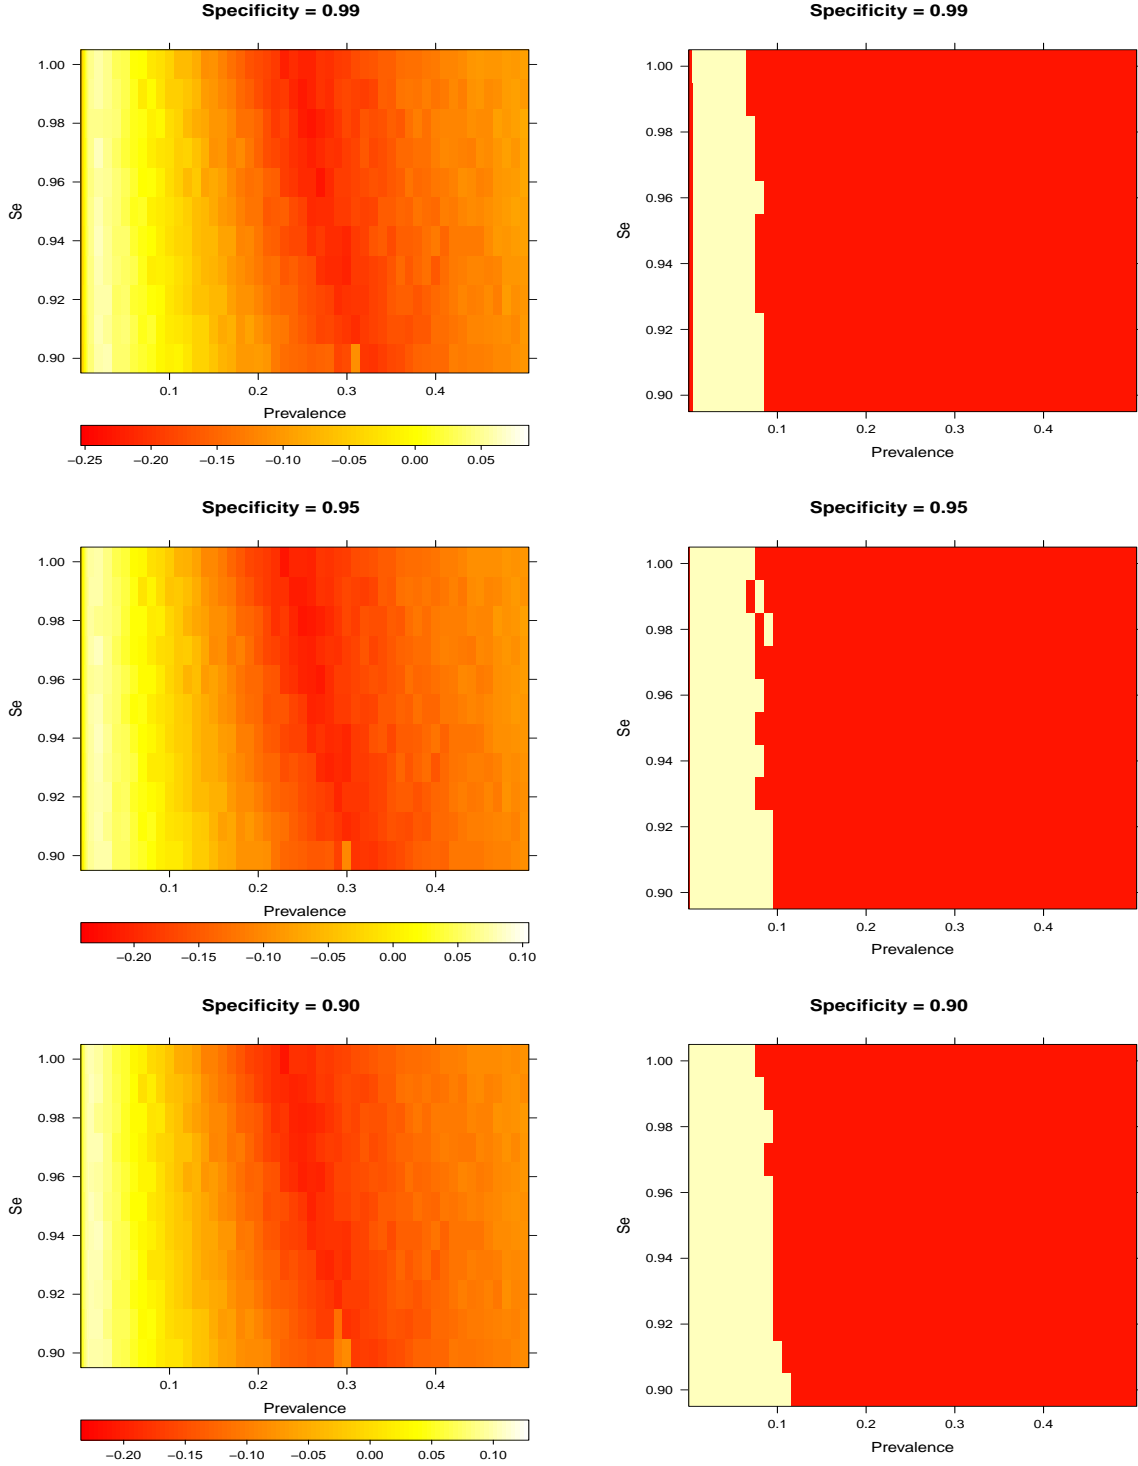

Figure 12: Comparison of TOD and A, when  $M = 20$  and  $N = 1000$ , using different levels of  $S_e$ ,  $S_p$ , and  $p$ . Left: Values of  $\{E(T|TOD) - E(T|A)\}/N$ , the difference in expected individual expenditure between TOD and A. Negative values mean that TOD is more efficient. Right: Binary versions of the corresponding figure on the left; regions in red indicate those settings where TOD is more efficient. The optimal array size for A has been used throughout.

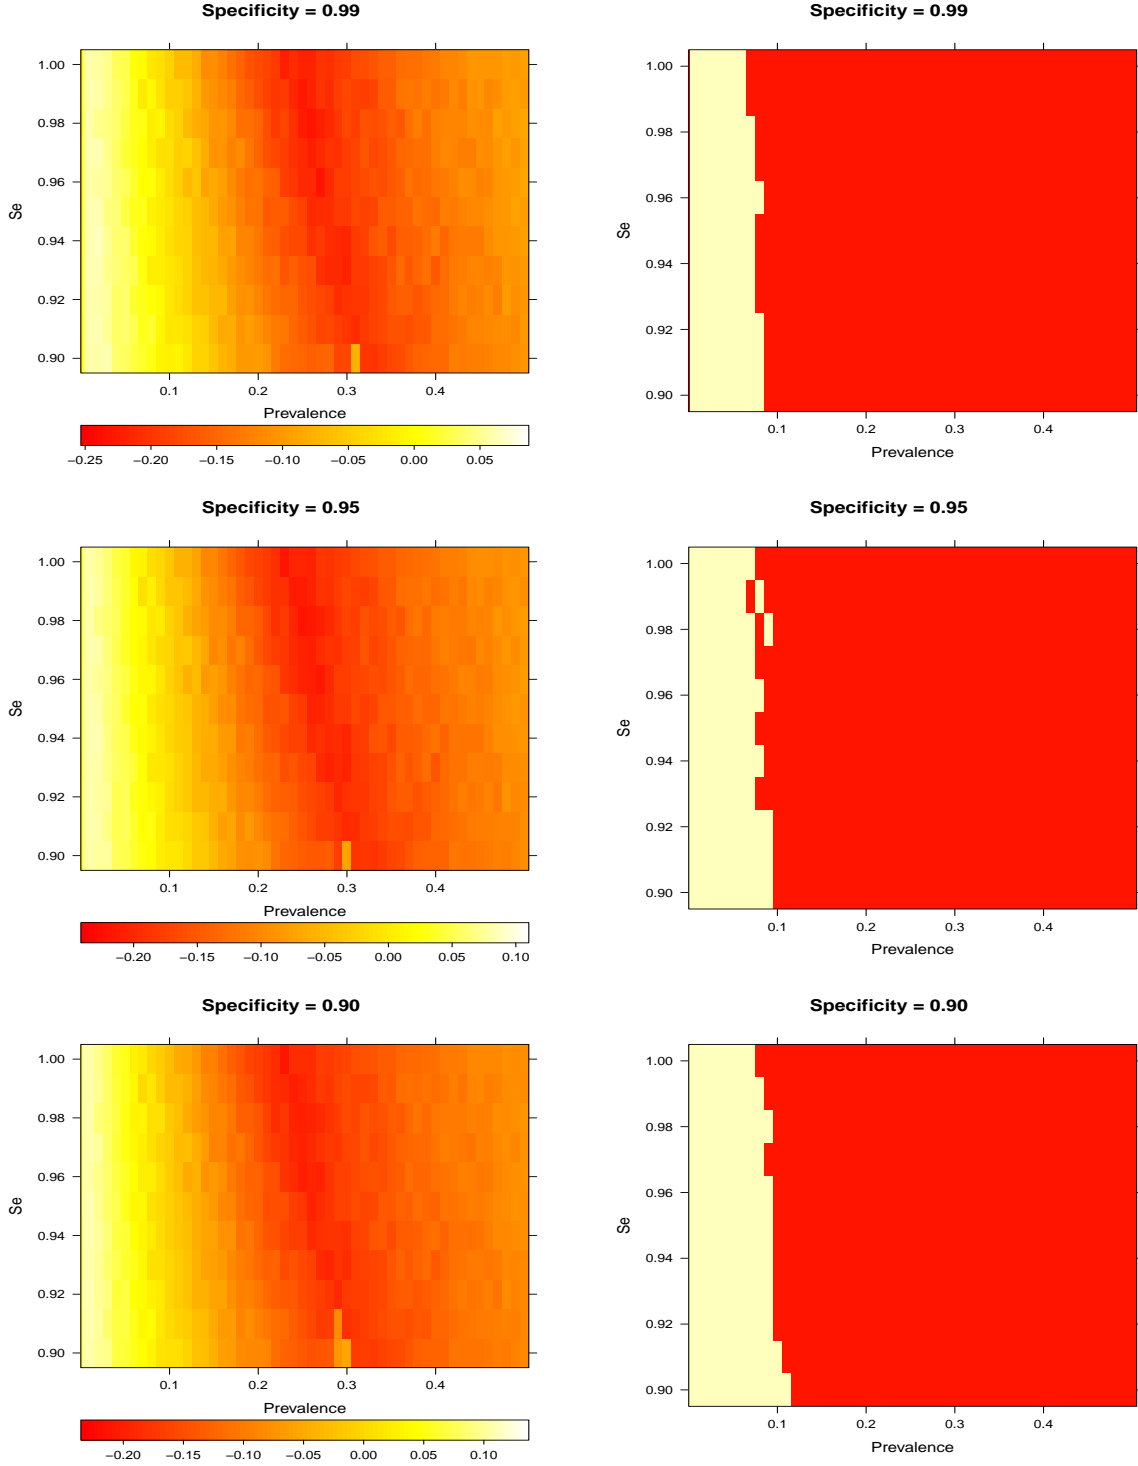

Figure 13: Comparison of TOD and A, when  $M = 30$  and  $N = 1000$ , using different levels of  $S_e$ ,  $S_p$ , and  $p$ . Left: Values of  $\{E(T|TOD) - E(T|A)\}/N$ , the difference in expected individual expenditure between TOD and A. Negative values mean that TOD is more efficient. Right: Binary versions of the corresponding figure on the left; regions in red indicate those settings where TOD is more efficient. The optimal array size for A has been used throughout.

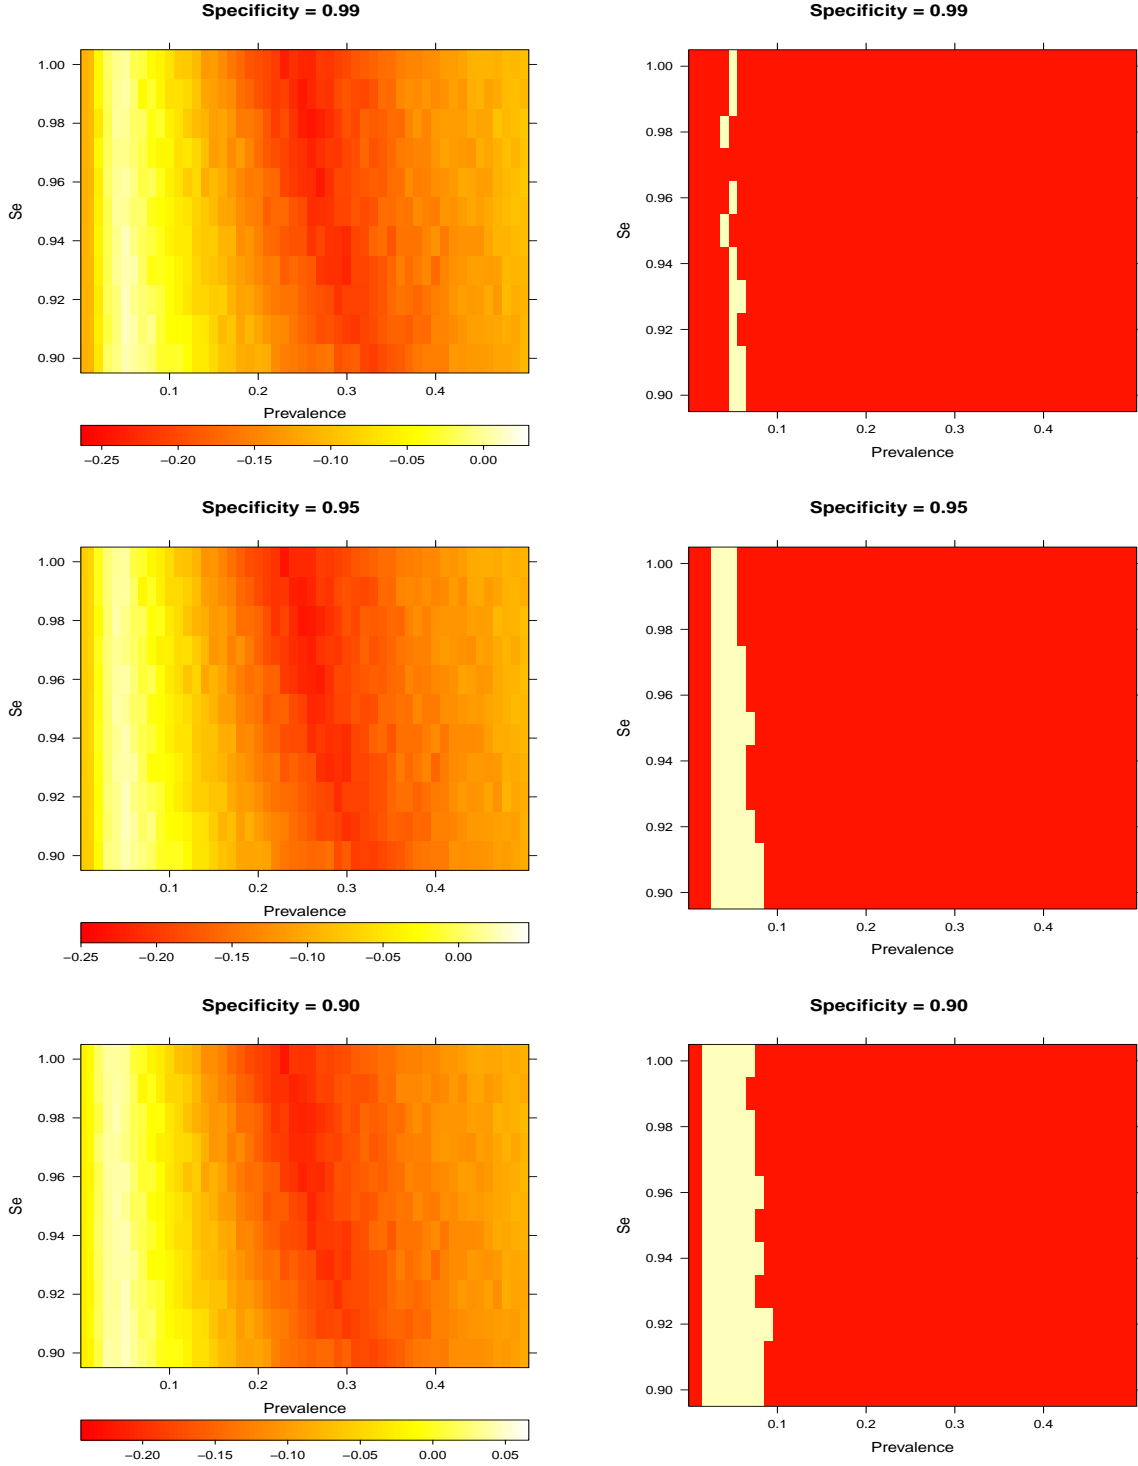

Figure 14: Comparison of PSOD and A, when  $M = 10$  and  $N = 1000$ , using different levels of  $S_e$ ,  $S_p$ , and  $p$ . Left: Values of  $\{E(T|PSOD) - E(T|A)\}/N$ , the difference in expected individual expenditure between PSOD and A. Negative values mean that PSOD is more efficient. Right: Binary versions of the corresponding figure on the left; regions in red indicate those settings where PSOD is more efficient. The optimal array size for A has been used throughout.

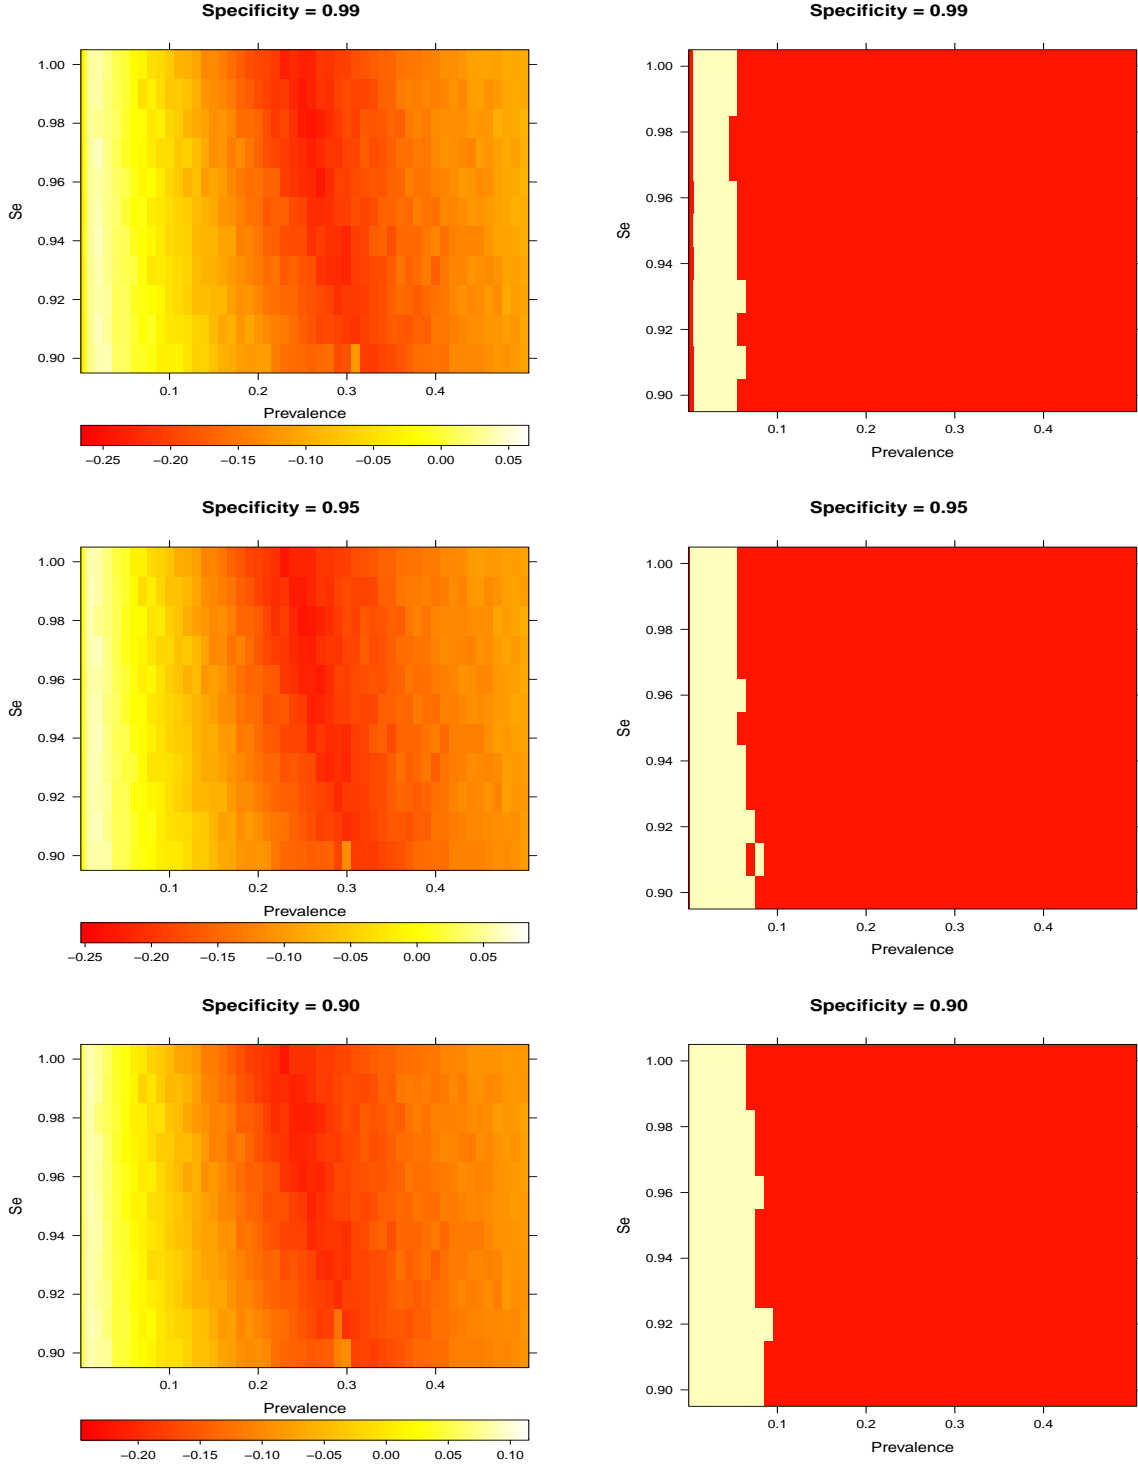

Figure 15: Comparison of PSOD and A, when  $M = 20$  and  $N = 1000$ , using different levels of  $S_e$ ,  $S_p$ , and  $p$ . Left: Values of  $\{E(T|PSOD) - E(T|A)\}/N$ , the difference in expected individual expenditure between PSOD and A. Negative values mean that PSOD is more efficient. Right: Binary versions of the corresponding figure on the left; regions in red indicate those settings where PSOD is more efficient. The optimal array size for A has been used throughout.



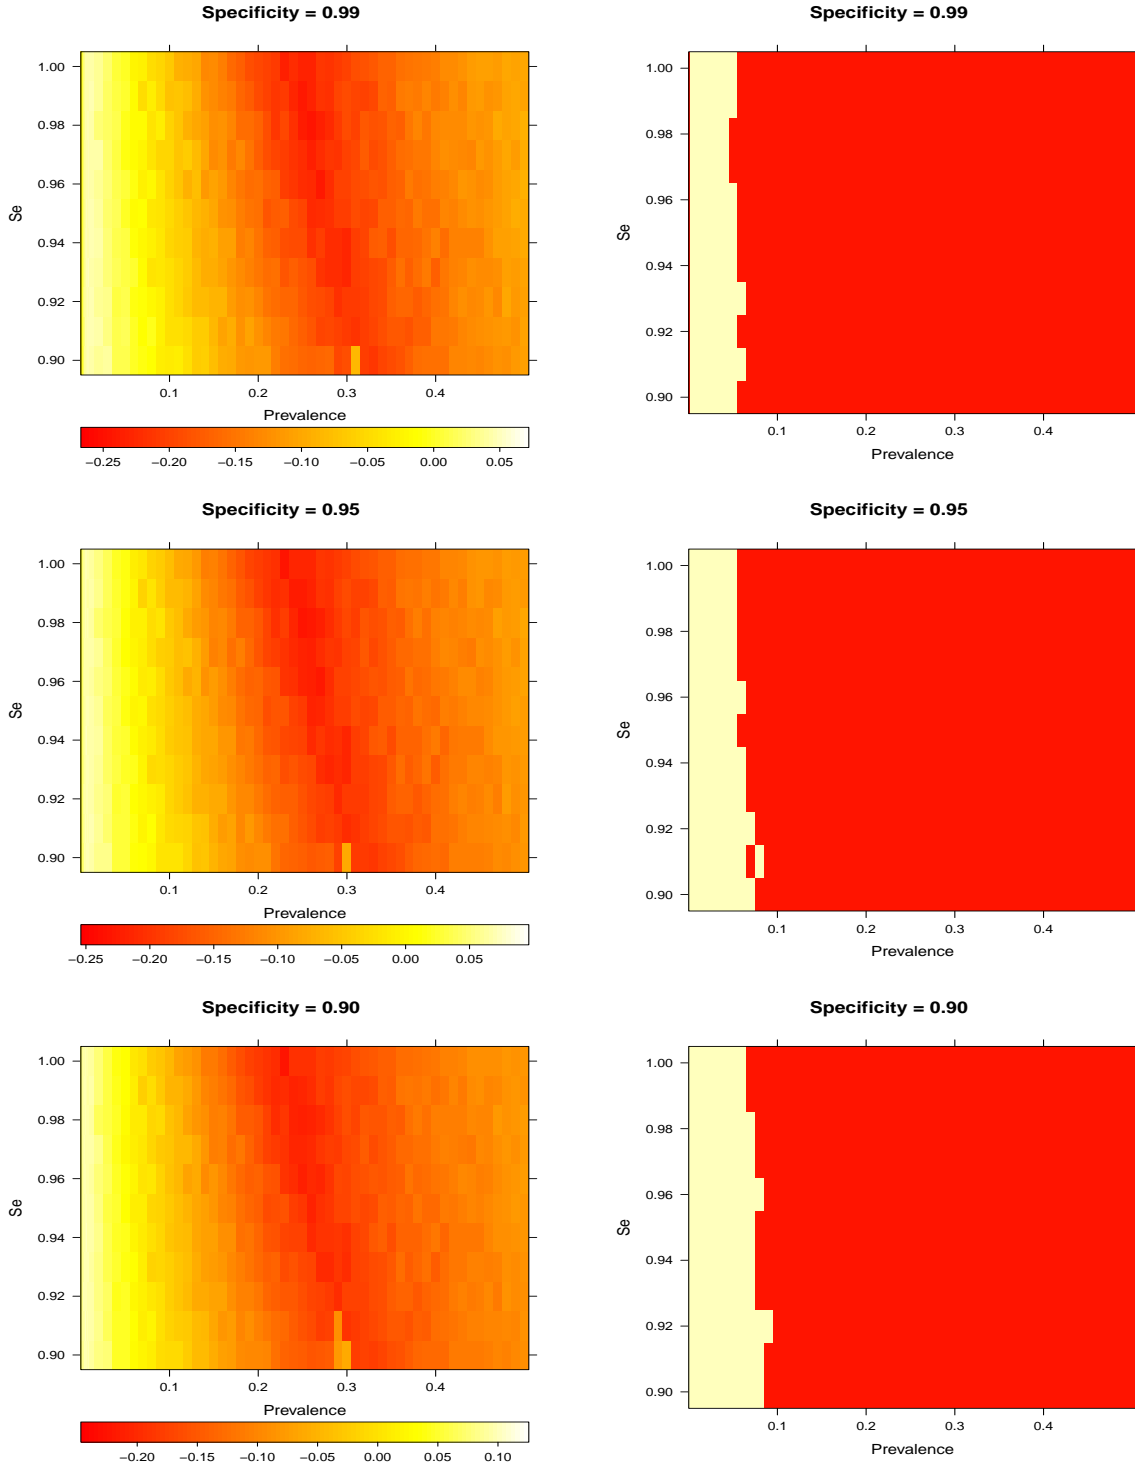

Figure 16: Comparison of PSOD and A, when  $M = 30$  and  $N = 1000$ , using different levels of  $S_e$ ,  $S_p$ , and  $p$ . Left: Values of  $\{E(T|PSOD) - E(T|A)\}/N$ , the difference in expected individual expenditure between PSOD and A. Negative values mean that PSOD is more efficient. Right: Binary versions of the corresponding figure on the left; regions in red indicate those settings where PSOD is more efficient. The optimal array size for A has been used throughout.

**Web Appendix D:** *Nebraska IPP results in Section 5.* This appendix contains all of the Nebraska IPP simulation results. Values of  $S_e$  and  $S_p$  are given in Table 1 of the manuscript. All measures are averaged over  $B = 1000$  implementations, as described in Section 5.

|            |                                                           |         |
|------------|-----------------------------------------------------------|---------|
| <b>D1:</b> | Summary of FIS and 3-stage halving procedures             | Page 27 |
|            | Methodology for computing accuracy measures               | Page 28 |
|            | Table 1: Optimal pool sizes identified for 2009 screening | Page 28 |
| <b>D2:</b> | Efficiency and accuracy measure comparisons for 2009      |         |
|            | Table 2: Block size $N = 50$ , Male subjects              | Page 29 |
|            | Table 3: Block size $N = 50$ , Female subjects            | Page 30 |
|            | Table 4: Block size $N = 100$ , Male subjects             | Page 31 |
|            | Table 5: Block size $N = 100$ , Female subjects           | Page 32 |
|            | Table 6: Block size $N = 200$ , Male subjects             | Page 33 |
|            | Table 7: Block size $N = 200$ , Female subjects           | Page 34 |
| <b>D3:</b> | Histograms of 2009 estimated probabilities                |         |
|            | Figure 1: Male subjects, by specimen type and infection   | Page 35 |
|            | Figure 2: Female subjects, by specimen type and infection | Page 36 |

FIS: We summarize the salient features of the Full Informative Sterrett (FIS) algorithm from Bilder et al. (2010). FIS starts by ordering individuals in a positive pool  $\mathcal{P}_j$  in terms of the risk probabilities, i.e.,  $p_{j(1)} \leq p_{j(2)} \leq \dots \leq p_{j(c_j)}$ , and begins by testing the highest risk individual  $\mathcal{I}_{j(c_j)}$ . If  $\mathcal{I}_{j(c_j)}$  tests positive, the remaining individuals are pooled and tested. If this subpool tests negative, decoding is complete. If  $\mathcal{I}_{j(c_j)}$  tests negative or if the subpool  $\{\mathcal{I}_{j(1)}, \mathcal{I}_{j(2)}, \dots, \mathcal{I}_{j(c_j-1)}\}$  tests positive, FIS moves to the next highest risk individual  $\mathcal{I}_{j(c_j-1)}$ . If  $\mathcal{I}_{j(c_j-1)}$  tests positive, the  $c_j - 2$  lowest risk individuals are pooled and tested. If  $\mathcal{I}_{j(c_j-1)}$  tests negative or if the subpool  $\{\mathcal{I}_{j(1)}, \mathcal{I}_{j(2)}, \dots, \mathcal{I}_{j(c_j-2)}\}$  tests positive, FIS proceeds to test  $\mathcal{I}_{j(c_j-2)}$ . This process continues until a subpool, possibly consisting of only  $\mathcal{I}_{j(1)}$ , tests negative or until  $\mathcal{I}_{j(1)}$  tests positive. The binary trees in Bilder et al. (2010) are helpful in depicting the FIS algorithm visually. To ensure the fairest possible comparison for 2009, we use the FIS (common) pool size that produced the smallest number of tests when decoding the 2008 individuals (averaged over  $B = 1000$  implementations). Under FIS (for 2009), individuals are assigned to pools chronologically, based on the specimen arrival date. Executing the algorithm then proceeds (as described above) on each pool using the year-2009 estimated probabilities.

3SH: The noninformative 3-stage halving algorithm, denoted by 3SH, proceeds by splitting each positive pool  $\mathcal{P}_j$ , at random, into equal-sized subpools (or as close to equal as possible) and testing the subpools. A subpool that tests negative is declared to be free of positive individuals. A subpool that tests positive is decoded by using individual testing. Under 3SH, individuals are assigned to pools chronologically, based on the specimen arrival date. In our analysis of the Nebraska IPP data, we consider initial (master) pool sizes of  $c_j = 4, 6, 8$  and 10 for 3SH. To ensure the fairest possible comparison for 2009, we use the master pool size that produced the smallest number of tests when decoding the 2008 individuals (averaged over  $B = 1000$  implementations). Executing the algorithm then proceeds (as described above) on each pool.

SUMMARY MEASURES: To estimate the efficiency  $E(T)$ , we compute the mean number of tests  $\bar{T}$ , the averaged value of  $T$  over  $B = 1000$  implementations. For classification accuracy, we compute

$$\begin{aligned}\overline{PS}_e &= \frac{1}{B} \sum_{b=1}^B \frac{1}{\tilde{N}^+} \sum_{i:\tilde{g}_i=1} I(g_{i,b} = 1) \\ \overline{PS}_p &= \frac{1}{B} \sum_{b=1}^B \frac{1}{\tilde{N}^-} \sum_{i:\tilde{g}_i=0} I(g_{i,b} = 0) \\ \overline{PPV} &= \frac{1}{B} \sum_{b=1}^B \frac{1}{N_b^+} \sum_{i:g_{i,b}=1} I(\tilde{g}_i = 1) \\ \overline{NPV} &= \frac{1}{B} \sum_{b=1}^B \frac{1}{N_b^-} \sum_{i:g_{i,b}=0} I(\tilde{g}_i = 0),\end{aligned}$$

where  $g_{i,b} = 1(0)$ , if the  $i$ th individual is classified as positive (negative) on the  $b$ th implementation,  $\tilde{N}^+$  ( $\tilde{N}^-$ ) denotes the number of positive (negative) individuals, and  $N_b^+$  ( $N_b^-$ ) denotes the number of individuals that test positive (negative) on the  $b$ th implementation. In contrast to the individual-specific measures derived in Section 2.2, reporting values of  $\overline{PS}_e$ ,  $\overline{PS}_p$ ,  $\overline{PPV}$ , and  $\overline{NPV}$  in this way allows us to describe the global performance of the algorithms for the year-2009 Nebraska IPP data.

Table 1: Optimal pool sizes for Nebraska IPP screening in 2009. Note that OD, TOD, PSOD, and H determine their own algorithm-specific pool size(s).

|            |        |          | Optimal $c$ |    |     |     |
|------------|--------|----------|-------------|----|-----|-----|
| Infection  | Gender | Specimen | D           | A  | FIS | 3SH |
| Chlamydia  | Female | Urine    | 5           | 9  | 10  | 10  |
|            |        | Swab     | 5           | 8  | 8   | 8   |
|            | Male   | Urine    | 5           | 8  | 8   | 8   |
|            |        | Swab     | 4           | 6  | 7   | 6   |
| Gonorrhoea | Female | Urine    | 8           | 10 | 10  | 10  |
|            |        | Swab     | 10          | 10 | 10  | 10  |
|            | Male   | Urine    | 10          | 10 | 10  | 10  |
|            |        | Swab     | 5           | 8  | 10  | 8   |

Table 2: Summary measures for 2009 Nebraska IPP data. Male subjects. Mean number of tests and classification accuracy measures, averaged over  $B = 1000$  implementations. Blocks of size  $N = 50$  are used for OD, TOD, PSOD, and H. There are 6139 (1910) urine (swab) specimens for each infection.

|                    | Method | $\bar{T}$ | $\overline{PS}_e$ | $\overline{PS}_p$ | $\overline{PPV}$ | $\overline{NPV}$ |
|--------------------|--------|-----------|-------------------|-------------------|------------------|------------------|
| Chlamydia<br>Urine | D      | 3417.3    | 0.865             | 0.985             | 0.833            | 0.988            |
|                    | OD     | 3301.6    | 0.865             | 0.986             | 0.842            | 0.988            |
|                    | TOD    | 3301.2    | 0.864             | 0.986             | 0.842            | 0.988            |
|                    | PSOD   | 3221.2    | 0.867             | 0.987             | 0.858            | 0.988            |
|                    | H      | 3218.2    | 0.865             | 0.987             | 0.858            | 0.988            |
|                    | FIS    | 2715.8    | 0.843             | 0.990             | 0.887            | 0.986            |
|                    | A      | 3136.4    | 0.806             | 0.988             | 0.857            | 0.983            |
|                    | 3SH    | 2721.1    | 0.695             | 0.992             | 0.881            | 0.974            |
| Chlamydia<br>Swab  | D      | 1395.7    | 0.855             | 0.980             | 0.889            | 0.973            |
|                    | OD     | 1299.1    | 0.854             | 0.982             | 0.897            | 0.973            |
|                    | TOD    | 1290.8    | 0.867             | 0.983             | 0.903            | 0.976            |
|                    | PSOD   | 1308.4    | 0.868             | 0.982             | 0.901            | 0.976            |
|                    | H      | 1289.1    | 0.870             | 0.983             | 0.904            | 0.976            |
|                    | FIS    | 1215.8    | 0.823             | 0.986             | 0.918            | 0.968            |
|                    | A      | 1385.4    | 0.796             | 0.982             | 0.893            | 0.963            |
|                    | 3SH    | 1202.4    | 0.677             | 0.990             | 0.925            | 0.943            |
| Gonorrhea<br>Urine | D      | 1956.3    | 0.941             | 0.992             | 0.716            | 0.999            |
|                    | OD     | 1767.9    | 0.941             | 0.994             | 0.768            | 0.999            |
|                    | TOD    | 1768.6    | 0.942             | 0.994             | 0.770            | 0.999            |
|                    | PSOD   | 1716.7    | 0.942             | 0.995             | 0.791            | 0.999            |
|                    | H      | 1691.7    | 0.941             | 0.994             | 0.787            | 0.999            |
|                    | FIS    | 1364.8    | 0.937             | 0.997             | 0.859            | 0.999            |
|                    | A      | 1630.5    | 0.919             | 0.998             | 0.917            | 0.998            |
|                    | 3SH    | 1396.2    | 0.859             | 0.997             | 0.864            | 0.997            |
| Gonorrhea<br>Swab  | D      | 1025.3    | 0.970             | 0.989             | 0.864            | 0.998            |
|                    | OD     | 829.4     | 0.970             | 0.992             | 0.899            | 0.998            |
|                    | TOD    | 787.6     | 0.977             | 0.991             | 0.894            | 0.998            |
|                    | PSOD   | 750.0     | 0.976             | 0.993             | 0.909            | 0.998            |
|                    | H      | 741.7     | 0.978             | 0.992             | 0.905            | 0.998            |
|                    | FIS    | 627.3     | 0.966             | 0.996             | 0.949            | 0.997            |
|                    | A      | 963.8     | 0.957             | 0.992             | 0.895            | 0.997            |
|                    | 3SH    | 918.5     | 0.927             | 0.992             | 0.902            | 0.995            |

Table 3: Summary measures for 2009 Nebraska IPP data. Female subjects. Mean number of tests and classification accuracy measures, averaged over  $B = 1000$  implementations. Blocks of size  $N = 50$  are used for OD, TOD, PSOD, and H. There are 4972 (14530) urine (swab) specimens for each infection.

|                    | Method | $\bar{T}$ | $\overline{PS}_e$ | $\overline{PS}_p$ | $\overline{PPV}$ | $\overline{NPV}$ |
|--------------------|--------|-----------|-------------------|-------------------|------------------|------------------|
| Chlamydia<br>Urine | D      | 2483.6    | 0.649             | 0.990             | 0.848            | 0.970            |
|                    | OD     | 2482.0    | 0.648             | 0.990             | 0.846            | 0.970            |
|                    | TOD    | 2483.2    | 0.649             | 0.990             | 0.847            | 0.970            |
|                    | PSOD   | 2458.7    | 0.653             | 0.990             | 0.857            | 0.970            |
|                    | H      | 2472.4    | 0.654             | 0.991             | 0.865            | 0.970            |
|                    | FIS    | 2049.4    | 0.598             | 0.991             | 0.856            | 0.966            |
|                    | A      | 2124.6    | 0.530             | 0.993             | 0.876            | 0.960            |
|                    | 3SH    | 1558.9    | 0.338             | 0.995             | 0.863            | 0.945            |
| Chlamydia<br>Swab  | D      | 7354.9    | 0.861             | 0.990             | 0.860            | 0.990            |
|                    | OD     | 7214.6    | 0.861             | 0.990             | 0.864            | 0.990            |
|                    | TOD    | 7213.4    | 0.861             | 0.990             | 0.864            | 0.990            |
|                    | PSOD   | 7076.9    | 0.864             | 0.991             | 0.877            | 0.990            |
|                    | H      | 7035.2    | 0.863             | 0.991             | 0.878            | 0.990            |
|                    | FIS    | 5864.7    | 0.841             | 0.993             | 0.901            | 0.988            |
|                    | A      | 6550.9    | 0.801             | 0.993             | 0.890            | 0.985            |
|                    | 3SH    | 5801.0    | 0.688             | 0.994             | 0.902            | 0.977            |
| Gonorrhea<br>Urine | D      | 1225.2    | 0.722             | 0.998             | 0.851            | 0.995            |
|                    | OD     | 1200.5    | 0.721             | 0.998             | 0.849            | 0.995            |
|                    | TOD    | 1203.8    | 0.721             | 0.998             | 0.849            | 0.995            |
|                    | PSOD   | 1212.3    | 0.724             | 0.998             | 0.864            | 0.995            |
|                    | H      | 1170.4    | 0.720             | 0.998             | 0.869            | 0.995            |
|                    | FIS    | 929.0     | 0.703             | 0.999             | 0.908            | 0.995            |
|                    | A      | 1229.2    | 0.659             | 0.999             | 0.943            | 0.994            |
|                    | 3SH    | 820.5     | 0.440             | 0.999             | 0.916            | 0.991            |
| Gonorrhea<br>Swab  | D      | 3401.8    | 0.934             | 0.998             | 0.834            | 0.999            |
|                    | OD     | 3179.8    | 0.933             | 0.998             | 0.871            | 0.999            |
|                    | TOD    | 3184.8    | 0.934             | 0.998             | 0.871            | 0.999            |
|                    | PSOD   | 3189.4    | 0.935             | 0.998             | 0.880            | 0.999            |
|                    | H      | 3128.7    | 0.932             | 0.998             | 0.879            | 0.999            |
|                    | FIS    | 2437.6    | 0.930             | 0.999             | 0.934            | 0.999            |
|                    | A      | 3467.2    | 0.918             | 0.999             | 0.958            | 0.999            |
|                    | 3SH    | 2565.2    | 0.842             | 0.999             | 0.928            | 0.998            |

Table 4: Summary measures for 2009 Nebraska IPP data. Male subjects. Mean number of tests and classification accuracy measures, averaged over  $B = 1000$  implementations. Blocks of size  $N = 100$  are used for OD, TOD, PSOD, and H. There are 6139 (1910) urine (swab) specimens for each infection.

|                    | Method | $\bar{T}$ | $\overline{PS}_e$ | $\overline{PS}_p$ | $\overline{PPV}$ | $\overline{NPV}$ |
|--------------------|--------|-----------|-------------------|-------------------|------------------|------------------|
| Chlamydia<br>Urine | D      | 3417.3    | 0.865             | 0.985             | 0.833            | 0.988            |
|                    | OD     | 3267.4    | 0.864             | 0.986             | 0.844            | 0.988            |
|                    | TOD    | 3267.6    | 0.865             | 0.986             | 0.843            | 0.988            |
|                    | PSOD   | 3210.5    | 0.867             | 0.987             | 0.855            | 0.988            |
|                    | H      | 3218.0    | 0.864             | 0.987             | 0.858            | 0.988            |
|                    | FIS    | 2715.8    | 0.843             | 0.990             | 0.887            | 0.986            |
|                    | A      | 3136.4    | 0.806             | 0.988             | 0.857            | 0.983            |
|                    | 3SH    | 2721.1    | 0.695             | 0.992             | 0.881            | 0.974            |
| Chlamydia<br>Swab  | D      | 1395.7    | 0.855             | 0.980             | 0.889            | 0.973            |
|                    | OD     | 1295.3    | 0.857             | 0.982             | 0.900            | 0.974            |
|                    | TOD    | 1288.7    | 0.865             | 0.983             | 0.902            | 0.975            |
|                    | PSOD   | 1285.4    | 0.868             | 0.982             | 0.902            | 0.976            |
|                    | H      | 1303.5    | 0.868             | 0.982             | 0.901            | 0.975            |
|                    | FIS    | 1215.8    | 0.823             | 0.986             | 0.918            | 0.968            |
|                    | A      | 1385.4    | 0.796             | 0.982             | 0.893            | 0.963            |
|                    | 3SH    | 1202.4    | 0.677             | 0.990             | 0.925            | 0.943            |
| Gonorrhea<br>Urine | D      | 1956.3    | 0.941             | 0.992             | 0.716            | 0.999            |
|                    | OD     | 1771.4    | 0.941             | 0.994             | 0.778            | 0.999            |
|                    | TOD    | 1767.7    | 0.939             | 0.994             | 0.778            | 0.999            |
|                    | PSOD   | 1672.8    | 0.942             | 0.995             | 0.796            | 0.999            |
|                    | H      | 1680.9    | 0.941             | 0.994             | 0.787            | 0.998            |
|                    | FIS    | 1364.8    | 0.937             | 0.997             | 0.859            | 0.999            |
|                    | A      | 1630.5    | 0.919             | 0.998             | 0.917            | 0.998            |
|                    | 3SH    | 1396.2    | 0.859             | 0.997             | 0.864            | 0.997            |
| Gonorrhea<br>Swab  | D      | 1025.3    | 0.970             | 0.989             | 0.864            | 0.998            |
|                    | OD     | 811.4     | 0.970             | 0.991             | 0.886            | 0.998            |
|                    | TOD    | 812.8     | 0.976             | 0.990             | 0.881            | 0.998            |
|                    | PSOD   | 752.7     | 0.977             | 0.992             | 0.904            | 0.998            |
|                    | H      | 746.1     | 0.976             | 0.992             | 0.903            | 0.998            |
|                    | FIS    | 627.3     | 0.966             | 0.996             | 0.949            | 0.997            |
|                    | A      | 963.8     | 0.957             | 0.992             | 0.895            | 0.997            |
|                    | 3SH    | 918.5     | 0.927             | 0.992             | 0.902            | 0.995            |

Table 5: Summary measures for 2009 Nebraska IPP data. Female subjects. Mean number of tests and classification accuracy measures, averaged over  $B = 1000$  implementations. Blocks of size  $N = 100$  are used for OD, TOD, PSOD, and H. There are 4972 (14530) urine (swab) specimens for each infection.

|                    |  | Method | $\bar{T}$ | $\overline{PS}_e$ | $\overline{PS}_p$ | $\overline{PPV}$ | $\overline{NPV}$ |
|--------------------|--|--------|-----------|-------------------|-------------------|------------------|------------------|
| Chlamydia<br>Urine |  | D      | 2483.6    | 0.649             | 0.990             | 0.848            | 0.970            |
|                    |  | OD     | 2469.4    | 0.649             | 0.990             | 0.846            | 0.970            |
|                    |  | TOD    | 2468.1    | 0.648             | 0.990             | 0.845            | 0.970            |
|                    |  | PSOD   | 2445.7    | 0.651             | 0.990             | 0.854            | 0.970            |
|                    |  | H      | 2450.7    | 0.654             | 0.991             | 0.867            | 0.970            |
|                    |  | FIS    | 2049.4    | 0.598             | 0.991             | 0.856            | 0.966            |
|                    |  | A      | 2124.6    | 0.530             | 0.993             | 0.876            | 0.960            |
|                    |  | 3SH    | 1558.9    | 0.338             | 0.995             | 0.863            | 0.945            |
| Chlamydia<br>Swab  |  | D      | 7354.9    | 0.861             | 0.990             | 0.860            | 0.990            |
|                    |  | OD     | 7168.6    | 0.862             | 0.990             | 0.867            | 0.990            |
|                    |  | TOD    | 7167.8    | 0.861             | 0.990             | 0.866            | 0.990            |
|                    |  | PSOD   | 7107.6    | 0.863             | 0.991             | 0.872            | 0.990            |
|                    |  | H      | 7103.3    | 0.863             | 0.990             | 0.874            | 0.989            |
|                    |  | FIS    | 5864.7    | 0.841             | 0.993             | 0.901            | 0.988            |
|                    |  | A      | 6550.9    | 0.801             | 0.993             | 0.890            | 0.985            |
|                    |  | 3SH    | 5801.0    | 0.688             | 0.994             | 0.902            | 0.977            |
| Gonorrhea<br>Urine |  | D      | 1225.2    | 0.722             | 0.998             | 0.851            | 0.995            |
|                    |  | OD     | 1194.4    | 0.718             | 0.998             | 0.860            | 0.995            |
|                    |  | TOD    | 1197.6    | 0.719             | 0.998             | 0.861            | 0.995            |
|                    |  | PSOD   | 1176.9    | 0.724             | 0.998             | 0.867            | 0.995            |
|                    |  | H      | 1155.4    | 0.723             | 0.998             | 0.871            | 0.995            |
|                    |  | FIS    | 929.0     | 0.703             | 0.999             | 0.908            | 0.995            |
|                    |  | A      | 1229.2    | 0.659             | 0.999             | 0.943            | 0.994            |
|                    |  | 3SH    | 820.5     | 0.440             | 0.999             | 0.916            | 0.991            |
| Gonorrhea<br>Swab  |  | D      | 3401.8    | 0.934             | 0.998             | 0.834            | 0.999            |
|                    |  | OD     | 3279.1    | 0.933             | 0.998             | 0.870            | 0.999            |
|                    |  | TOD    | 3279.1    | 0.932             | 0.998             | 0.871            | 0.999            |
|                    |  | PSOD   | 3128.0    | 0.935             | 0.998             | 0.881            | 0.999            |
|                    |  | H      | 3127.1    | 0.932             | 0.998             | 0.874            | 0.999            |
|                    |  | FIS    | 2437.6    | 0.930             | 0.999             | 0.934            | 0.999            |
|                    |  | A      | 3467.2    | 0.918             | 0.999             | 0.958            | 0.999            |
|                    |  | 3SH    | 2565.2    | 0.842             | 0.999             | 0.928            | 0.998            |



Table 6: Summary measures for 2009 Nebraska IPP data. Male subjects. Mean number of tests and classification accuracy measures, averaged over  $B = 1000$  implementations. Blocks of size  $N = 200$  are used for OD, TOD, PSOD, and H. There are 6139 (1910) urine (swab) specimens for each infection.

|                    | Method | $\bar{T}$ | $\overline{PS}_e$ | $\overline{PS}_p$ | $\overline{PPV}$ | $\overline{NPV}$ |
|--------------------|--------|-----------|-------------------|-------------------|------------------|------------------|
| Chlamydia<br>Urine | D      | 3417.3    | 0.865             | 0.985             | 0.833            | 0.988            |
|                    | OD     | 3271.5    | 0.864             | 0.986             | 0.844            | 0.988            |
|                    | TOD    | 3271.5    | 0.865             | 0.986             | 0.845            | 0.988            |
|                    | PSOD   | 3218.1    | 0.867             | 0.987             | 0.853            | 0.988            |
|                    | H      | 3240.8    | 0.865             | 0.987             | 0.855            | 0.988            |
|                    | FIS    | 2715.8    | 0.843             | 0.990             | 0.887            | 0.986            |
|                    | A      | 3136.4    | 0.806             | 0.988             | 0.857            | 0.983            |
|                    | 3SH    | 2721.1    | 0.695             | 0.992             | 0.881            | 0.974            |
| Chlamydia<br>Swab  | D      | 1395.7    | 0.855             | 0.980             | 0.889            | 0.973            |
|                    | OD     | 1311.4    | 0.857             | 0.982             | 0.899            | 0.974            |
|                    | TOD    | 1301.2    | 0.865             | 0.981             | 0.896            | 0.975            |
|                    | PSOD   | 1316.3    | 0.867             | 0.981             | 0.895            | 0.975            |
|                    | H      | 1309.0    | 0.869             | 0.981             | 0.899            | 0.975            |
|                    | FIS    | 1215.8    | 0.823             | 0.986             | 0.918            | 0.968            |
|                    | A      | 1385.4    | 0.796             | 0.982             | 0.893            | 0.963            |
|                    | 3SH    | 1202.4    | 0.677             | 0.990             | 0.925            | 0.943            |
| Gonorrhea<br>Urine | D      | 1956.3    | 0.941             | 0.992             | 0.716            | 0.999            |
|                    | OD     | 1704.5    | 0.941             | 0.994             | 0.759            | 0.999            |
|                    | TOD    | 1704.7    | 0.940             | 0.994             | 0.761            | 0.999            |
|                    | PSOD   | 1624.8    | 0.941             | 0.995             | 0.799            | 0.999            |
|                    | H      | 1618.2    | 0.940             | 0.994             | 0.799            | 0.998            |
|                    | FIS    | 1364.8    | 0.937             | 0.997             | 0.859            | 0.999            |
|                    | A      | 1630.5    | 0.919             | 0.998             | 0.917            | 0.998            |
|                    | 3SH    | 1396.2    | 0.859             | 0.997             | 0.864            | 0.997            |
| Gonorrhea<br>Swab  | D      | 1025.3    | 0.970             | 0.989             | 0.864            | 0.998            |
|                    | OD     | 806.3     | 0.970             | 0.990             | 0.882            | 0.998            |
|                    | TOD    | 816.9     | 0.977             | 0.989             | 0.874            | 0.998            |
|                    | PSOD   | 766.3     | 0.976             | 0.992             | 0.898            | 0.998            |
|                    | H      | 742.8     | 0.976             | 0.992             | 0.903            | 0.998            |
|                    | FIS    | 627.3     | 0.966             | 0.996             | 0.949            | 0.997            |
|                    | A      | 963.8     | 0.957             | 0.992             | 0.895            | 0.997            |
|                    | 3SH    | 918.5     | 0.927             | 0.992             | 0.902            | 0.995            |

Table 7: Summary measures for 2009 Nebraska IPP data. Female subjects. Mean number of tests and classification accuracy measures, averaged over  $B = 1000$  implementations. Blocks of size  $N = 200$  are used for OD, TOD, PSOD, and H. There are 4972 (14530) urine (swab) specimens for each infection.

|                    | Method | $\bar{T}$ | $\overline{PS}_e$ | $\overline{PS}_p$ | $\overline{PPV}$ | $\overline{NPV}$ |
|--------------------|--------|-----------|-------------------|-------------------|------------------|------------------|
| Chlamydia<br>Urine | D      | 2483.6    | 0.649             | 0.990             | 0.848            | 0.970            |
|                    | OD     | 2451.3    | 0.648             | 0.990             | 0.851            | 0.970            |
|                    | TOD    | 2453.1    | 0.649             | 0.990             | 0.851            | 0.970            |
|                    | PSOD   | 2434.5    | 0.648             | 0.990             | 0.852            | 0.970            |
|                    | H      | 2469.9    | 0.652             | 0.991             | 0.964            | 0.970            |
|                    | FIS    | 2049.4    | 0.598             | 0.991             | 0.856            | 0.966            |
|                    | A      | 2124.6    | 0.530             | 0.993             | 0.876            | 0.960            |
|                    | 3SH    | 1558.9    | 0.338             | 0.995             | 0.863            | 0.945            |
| Chlamydia<br>Swab  | D      | 7354.9    | 0.861             | 0.990             | 0.860            | 0.990            |
|                    | OD     | 7189.1    | 0.861             | 0.990             | 0.866            | 0.990            |
|                    | TOD    | 7190.6    | 0.862             | 0.990             | 0.866            | 0.990            |
|                    | PSOD   | 7091.1    | 0.863             | 0.991             | 0.871            | 0.990            |
|                    | H      | 7054.2    | 0.862             | 0.991             | 0.877            | 0.989            |
|                    | FIS    | 5864.7    | 0.841             | 0.993             | 0.901            | 0.988            |
|                    | A      | 6550.9    | 0.801             | 0.993             | 0.890            | 0.985            |
|                    | 3SH    | 5801.0    | 0.688             | 0.994             | 0.902            | 0.977            |
| Gonorrhea<br>Urine | D      | 1225.2    | 0.722             | 0.998             | 0.851            | 0.995            |
|                    | OD     | 1178.6    | 0.722             | 0.998             | 0.837            | 0.995            |
|                    | TOD    | 1177.8    | 0.722             | 0.998             | 0.836            | 0.995            |
|                    | PSOD   | 1169.6    | 0.720             | 0.998             | 0.861            | 0.995            |
|                    | H      | 1176.4    | 0.719             | 0.998             | 0.867            | 0.995            |
|                    | FIS    | 929.0     | 0.703             | 0.999             | 0.908            | 0.995            |
|                    | A      | 1229.2    | 0.659             | 0.999             | 0.943            | 0.994            |
|                    | 3SH    | 820.5     | 0.440             | 0.999             | 0.916            | 0.991            |
| Gonorrhea<br>Swab  | D      | 3401.8    | 0.934             | 0.998             | 0.834            | 0.999            |
|                    | OD     | 3215.3    | 0.932             | 0.998             | 0.851            | 0.999            |
|                    | TOD    | 3216.7    | 0.933             | 0.998             | 0.851            | 0.999            |
|                    | PSOD   | 3125.9    | 0.933             | 0.998             | 0.878            | 0.999            |
|                    | H      | 3108.4    | 0.932             | 0.998             | 0.875            | 0.999            |
|                    | FIS    | 2437.6    | 0.930             | 0.999             | 0.934            | 0.999            |
|                    | A      | 3467.2    | 0.918             | 0.999             | 0.958            | 0.999            |
|                    | 3SH    | 2565.2    | 0.842             | 0.999             | 0.928            | 0.998            |

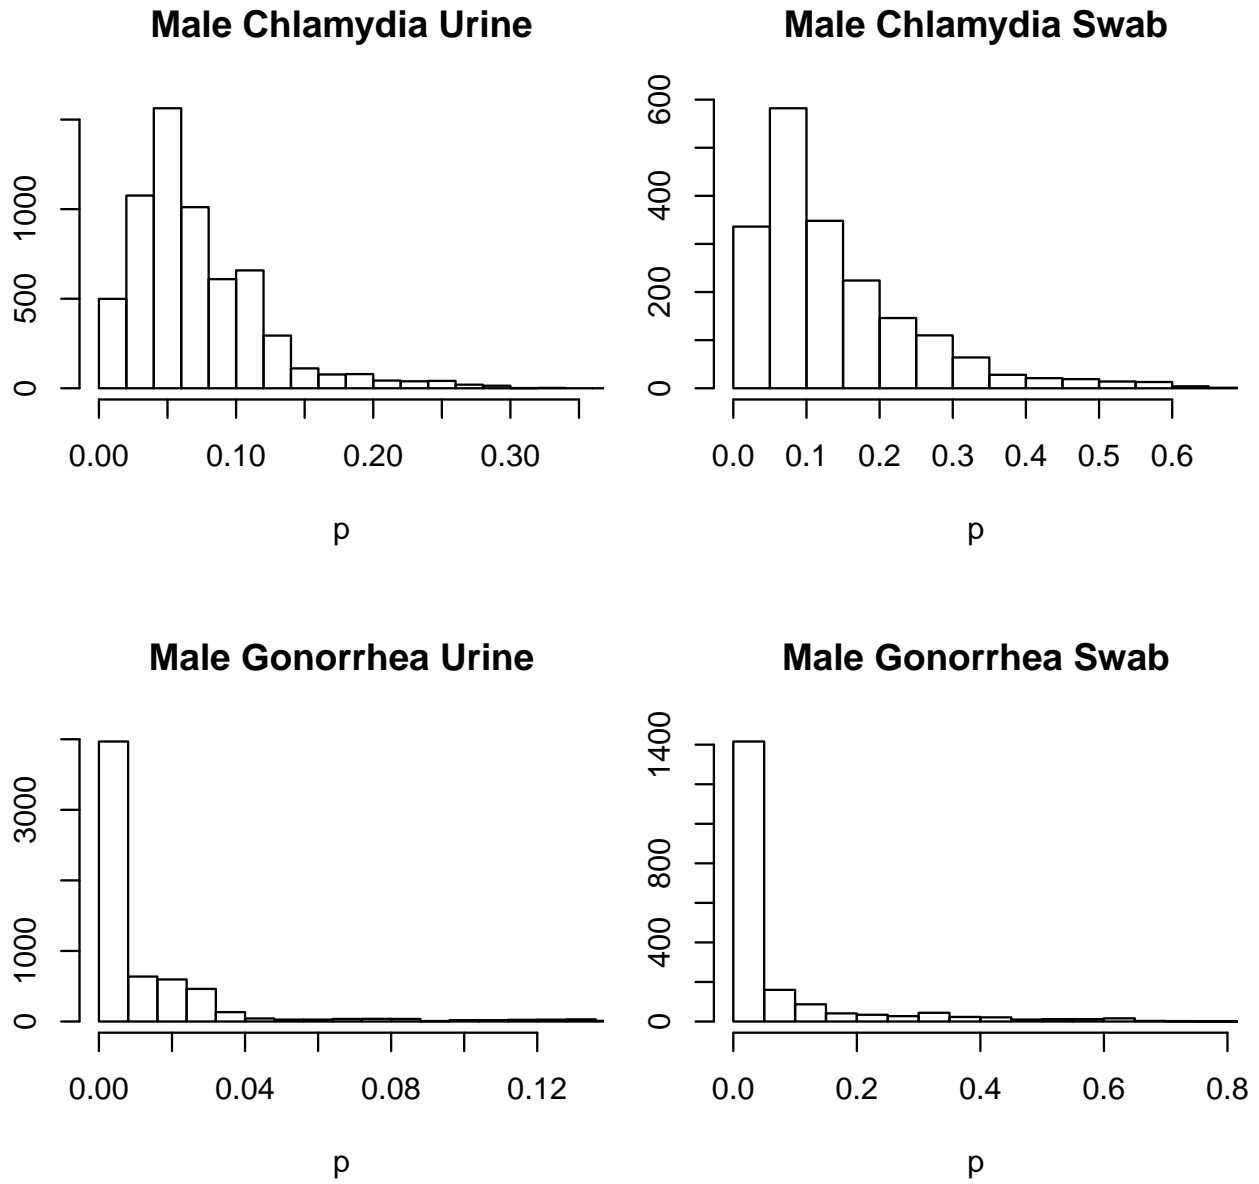

Figure 1: Nebraska IPP data. Histograms of the estimated probabilities  $\hat{p}_i$  from 2009. Male subjects.

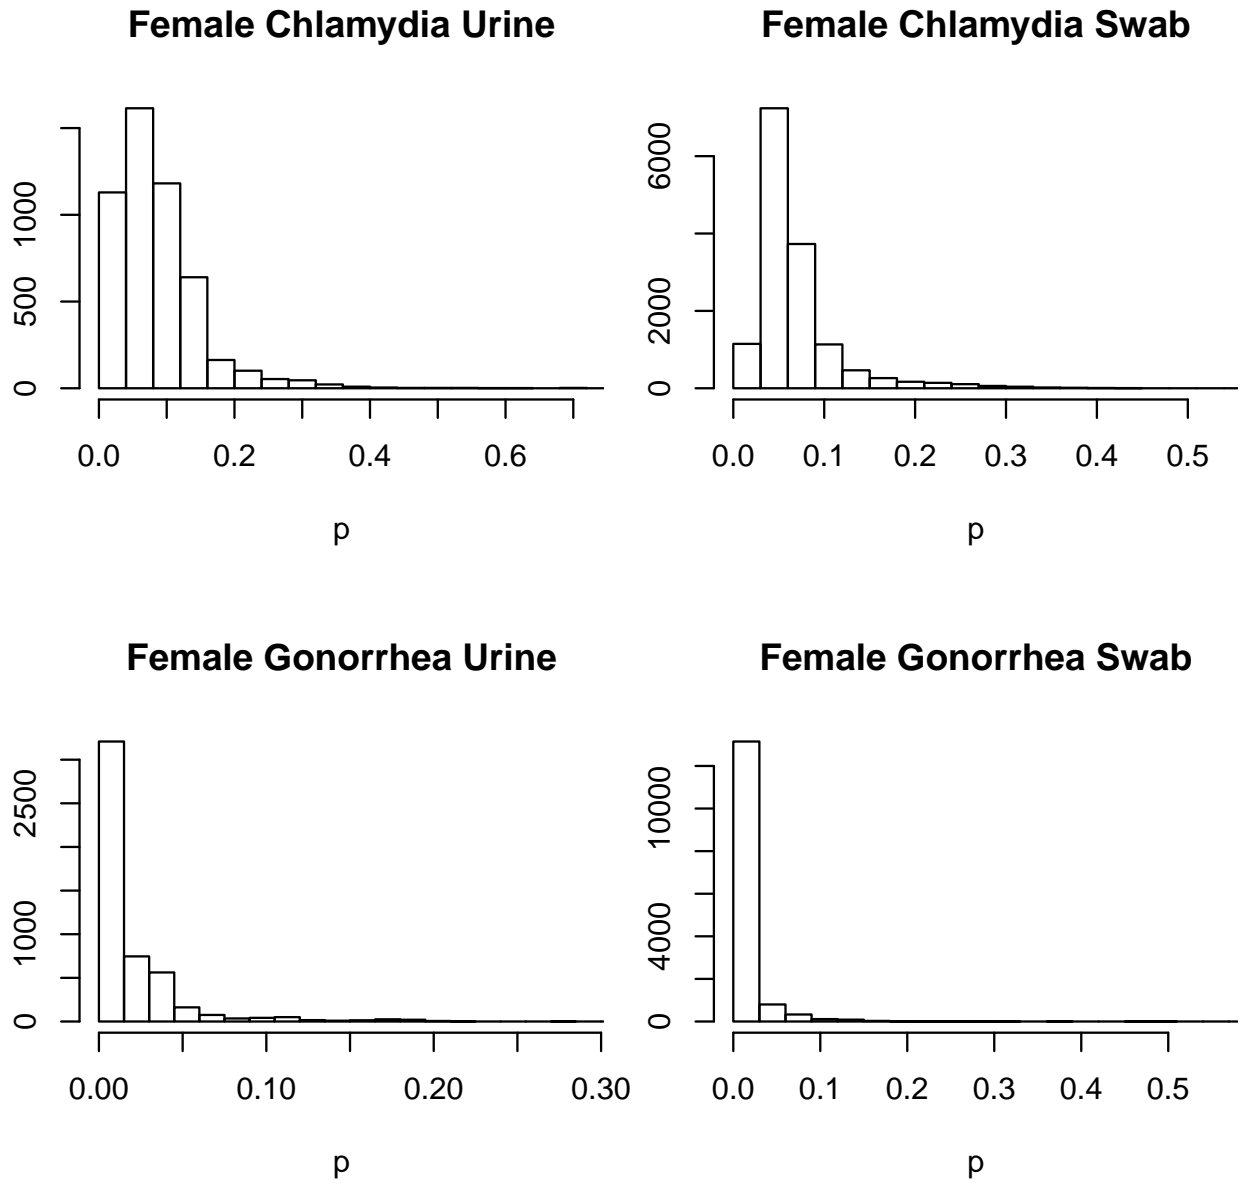

Figure 2: Nebraska IPP data. Histograms of the estimated probabilities  $\hat{p}_i$  from 2009. Female subjects.
